# Supplementary material
Source: PubMed Central journal article supplement (PMC6604088)
Supplement: jamaophthalmol-137-1005-s001.pdf [file jamaophthalmol-137-1005-s001.pdf]

## Supplementary Online Content

Khawaja AP, Rojas Lopez KE, Hardcastle AJ, et al. Genetic variants associated with corneal biomechanical properties and potentially conferring susceptibility to keratoconus in a genome-wide association study. *JAMA Ophthalmol*. Published online June 27, 2019. doi:10.1001/jamaophthalmol.2019.2058

**eMethods.** Participants and Analyses

**eFigure 1.** Q-Q Plots for the CH (Left) and CRF (Right) Discovery GWAS in EPIC-Norfolk

**eFigure 2.** LocusZoom Plots for Significant Loci From the GWAS Meta-analysis of Corneal Hysteresis in EPIC-Norfolk and TwinsUK

**eFigure 3.** LocusZoom Plots for Significant Loci From the GWAS Meta-analysis of Corneal Resistance Factor in EPIC-Norfolk and TwinsUK

**eFigure 4.** Associations of Loci With Keratoconus

**eTable 1.** Genome-wide Significant SNPs From Corneal Hysteresis GWAS in EPIC-Norfolk

**eTable 2.** Genome-wide Significant SNPs From Corneal Resistance Factor GWAS in EPIC-Norfolk

**eTable 3.** Genome-wide Significant SNPs From Meta-analysis of Corneal Hysteresis GWAS in EPIC-Norfolk and TwinsUK

**eTable 4.** Genome-wide Significant SNPs From Meta-analysis of Corneal Resistance Factor GWAS in EPIC-Norfolk and TwinsUK

**eTable 5.** Corneal Tissue Specific Expression Profiles

**eReferences.**

This supplementary material has been provided by the authors to give readers additional information about their work.

## **eMethods. Participants and Analyses**

### **EPIC-Norfolk Eye Study methods and genotyping**

The European Prospective Investigation into Cancer (EPIC) study is a pan-European prospective cohort study designed to investigate the aetiology of major chronic diseases.<sup>1</sup> EPIC-Norfolk, one of the United Kingdom (UK) arms of EPIC, recruited and examined 25,639 participants aged 40-79 years between 1993 and 1997 for the baseline examination.<sup>2</sup> Recruitment was via general practices in the city of Norwich and the surrounding small towns and rural areas, and methods have been described in detail previously.<sup>2</sup> Since virtually all residents in the UK are registered with a general practitioner through the National Health Service, general practice lists serve as population registers. Ophthalmic assessment formed part of the third health examination and this has been termed the EPIC-Norfolk Eye Study.<sup>3</sup> Between 2004 and 2011 a total of 8,623 participants were seen for the ophthalmic examination. The EPIC-Norfolk Eye Study was carried out following the principles of the Declaration of Helsinki and the Research Governance Framework for Health and Social Care. The study was approved by the Norfolk Local Research Ethics Committee (05/Q0101/191) and East Norfolk & Waveney NHS Research Governance Committee (2005EC07L). All participants gave written, informed consent.

Genotyping was undertaken using the Affymetrix UK Biobank Axiom Array. SNP exclusion criteria included: call rate < 95%, abnormal cluster pattern on visual inspection, plate batch effect evident by significant variation in minor allele frequency (MAF), and/or Hardy-Weinberg equilibrium  $P < 10^{-7}$ . Sample exclusion criteria included: DishQC < 0.82 (poor fluorescence signal contrast), sex discordance, sample call rate < 97%, heterozygosity outliers (calculated separately for SNPs with minor allele frequency >1% and <1%), rare allele count outlier, and impossible identity-by-descent values. Following these exclusions, there were no ethnic outliers as ascertained by examining the first 5 principal components plotted against each other. Data were pre-phased using SHAPEIT version 2<sup>4</sup> and imputed to the Phase 3 build of the 1000 Genomes project (October 2014)<sup>5</sup> using IMPUTE version 2.3.2.<sup>6</sup>

### **TwinsUK methods, genotyping and sequencing**

The TwinsUK is an Adult Twin Registry based at St Thomas' Hospital, London. Participants were unaware of any hypotheses or proposals for specific studies; only later were they invited to have an eye examination. The St Thomas' Hospital Local Research Ethics Committee approved the study, and all the twin participants volunteered to join the TwinsUK Registry and gave informed consent to attend

the hospital for phenotyping and for their data to be used for scientific research. The study planned to exclude subjects who had corneal refractive surgery, but no participants reported having had this done.

Genotyping was done using the Illumina's HumanHap610-Quad array. Genotype calling was done using the GenomeStudio Software. SNPs were removed from subsequent analyses if they had low genotyping success rate (<95%), were in Hardy-Weinberg Disequilibrium ( $p < 10^{-6}$ ), MAF different by more than 0.05 from those reported in the 1000 Genomes Project and quality control criteria for inclusion of subjects were sufficient genotyping success rate across all loci (>95%), heterozygosity within 3 standard deviations (SD) of European samples participating in the Hapmap phase 2 Project, calculated using the same exact set of SNPs that overlap between the HumanHap610-Quad array and the Hapmap phase 2 dataset. The genotypes were phased using the Shapelt software and ungenotyped loci were imputed using IMPUTE 2.0, based on information available from the Phase 3 build of the 1000 genomes project.

An independent subset of TwinsUK participants that did not contribute to the CH and CRF GWAS were used as controls for comparison with keratoconus cases. Whole genome sequencing was carried out in these participants as part of the UK10K project.<sup>7</sup> TwinsUK DNA samples, sequencing libraries and clustering were prepared following established protocols.<sup>7</sup> Only twins with non-admixed homogenous European ancestry as ascertained by principal component analysis of their genotypes were retained for data analysis described in this work. DNA samples were sequenced on an Illumina HiSeqX sequencer using a 150-base paired-end single-index-read format as described elsewhere.<sup>8</sup> Reads were mapped to human reference sequence build hg38 and variants were called using ISIS Analysis Software (v. 2.5.26.13; Illumina). Sequencing data with more than 30× coverage was obtained for a total of 2,377 whole genomes, including for 324 parents of the twins. Family relationships, including twinship and parent-offspring relations were calculated and checked for inconsistencies with self-reported relatedness. The quality metrics and filters applied to the sequencing data have been described in detail.<sup>7</sup> Overall, 1,960 subjects, including 383 monozygotic twins and 522 dizygotic twins, passed the quality control filtering described above, of which only subjects for whom no CRF or CH data available were compared to keratoconus patients in the case-control analysis.

### **Corneal tissue gene expression analysis**

We examined the relative expression in human cornea of the genes at loci we identified as associated with CH, CRF or keratoconus. RNA-seq data from human fetal and adult corneal endothelial cells<sup>9</sup> and from four distinct human limbal compartments (the basal limbal crypts, the superficial limbal crypts, the paracentral/central corneal epithelium and the adjacent limbal stroma<sup>10</sup>) were aligned to the human genome reference hg19 and hg38 respectively using Bowtie alignment tool.<sup>11</sup> Gene read counts were generated using the featureCounts tool<sup>12</sup> and used to generate transcripts per million (TPM) values as per the formula provided by Wagner, Kin, & Lynch.<sup>13</sup>

**eFigure 1.** Q-Q Plots for the CH (Left) and CRF (Right) Discovery GWAS in EPIC-Norfolk

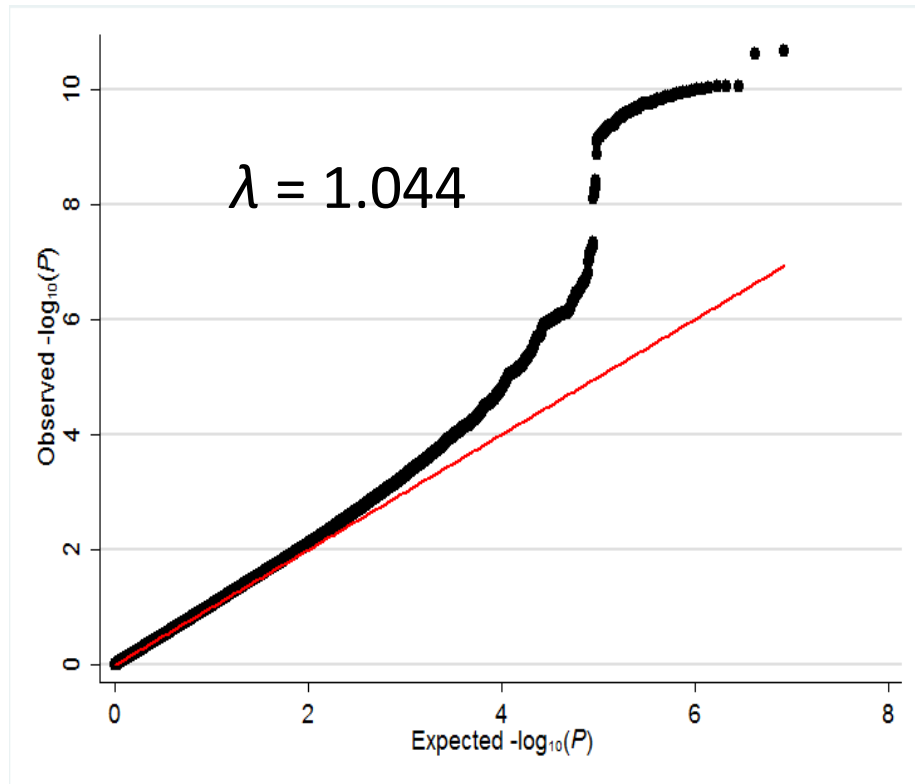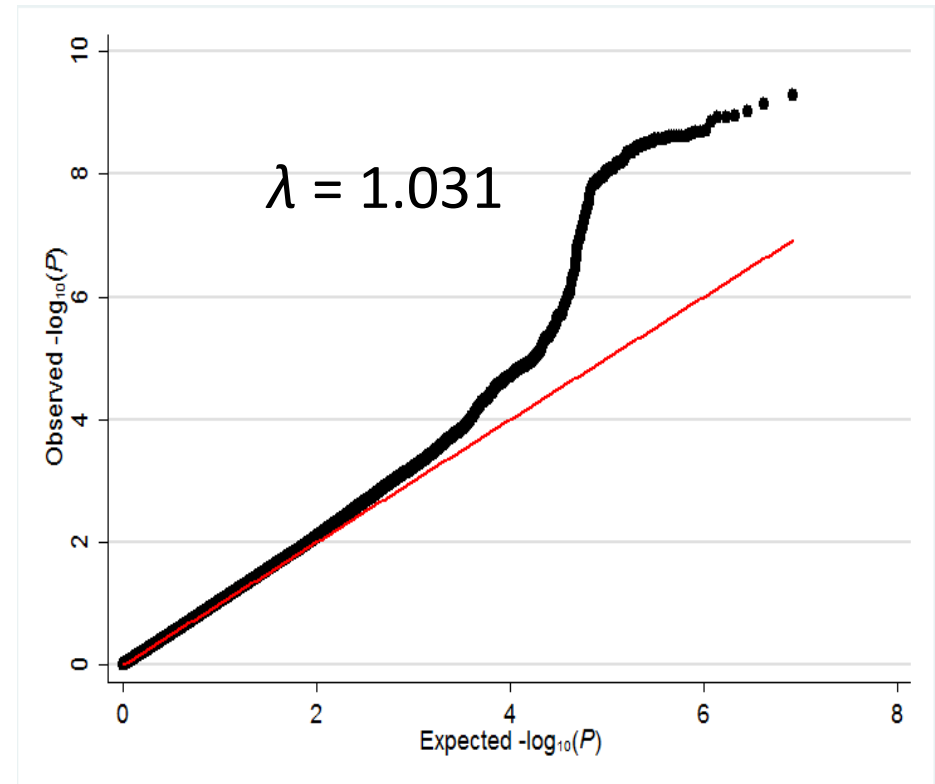

**eFigure 2.** LocusZoom Plots for Significant Loci From the GWAS Meta-analysis of Corneal Hysteresis in EPIC-Norfolk and TwinsUK

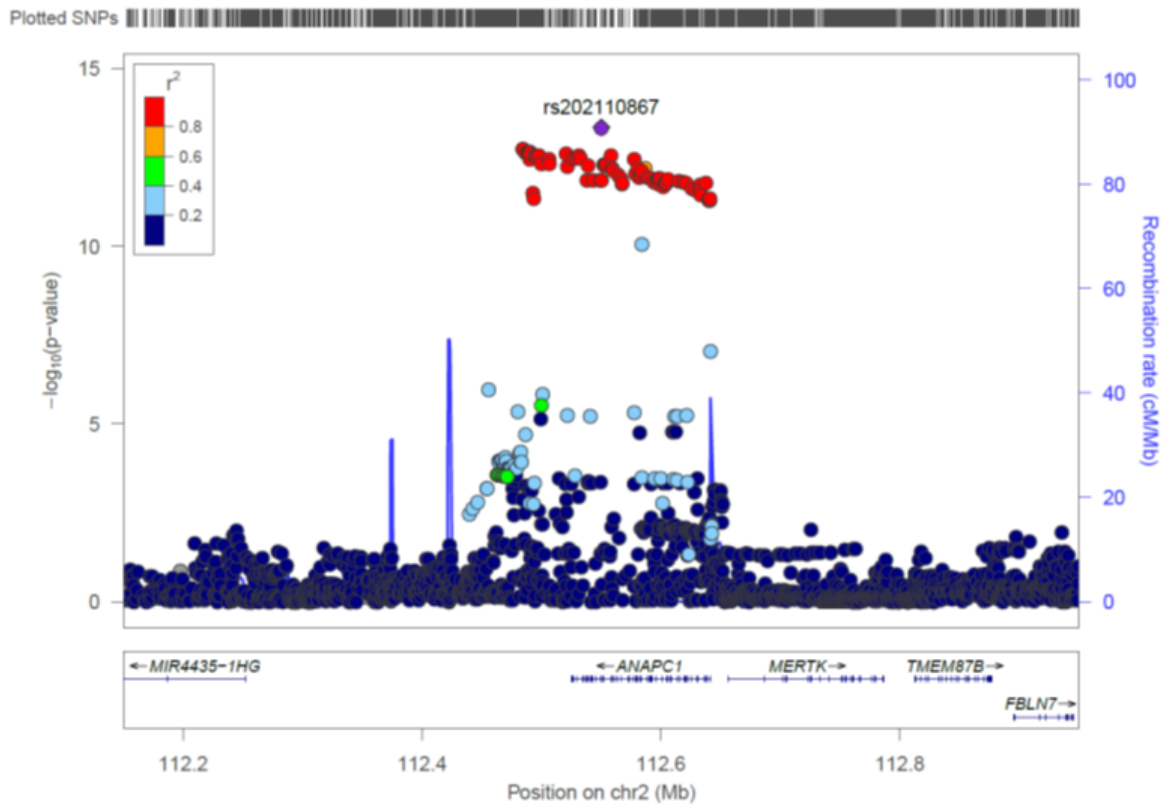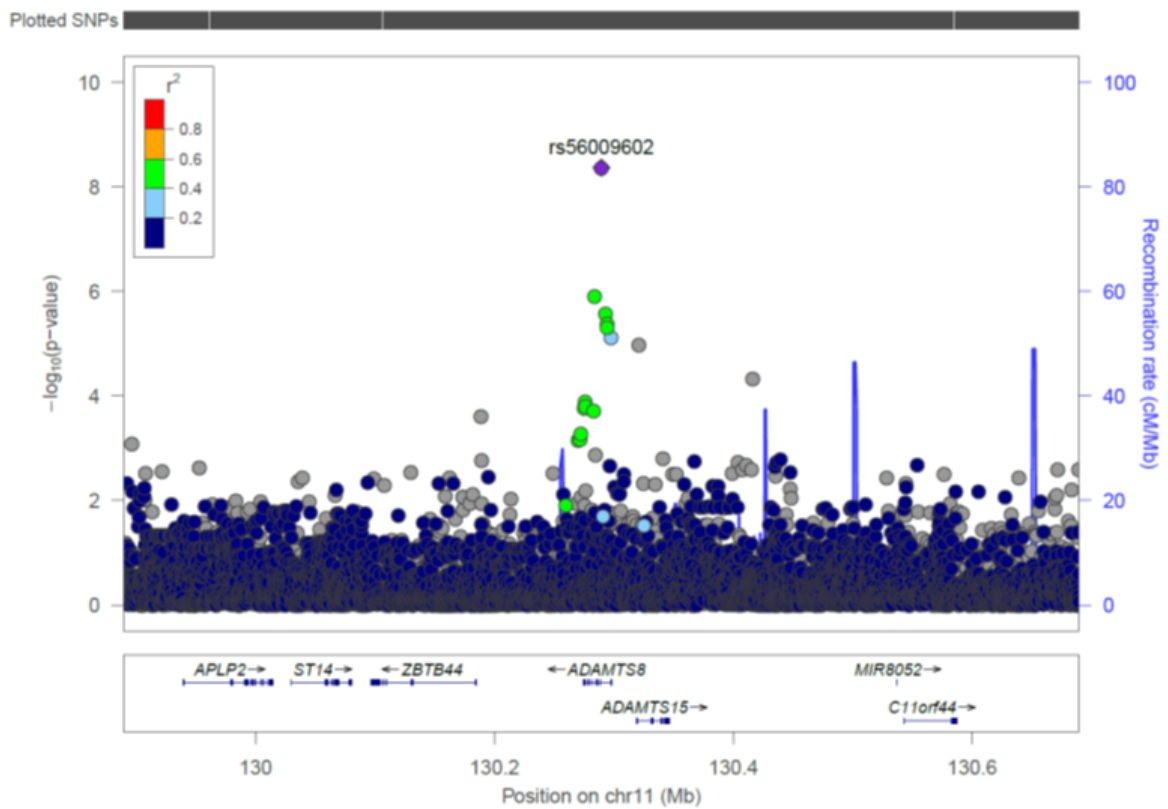

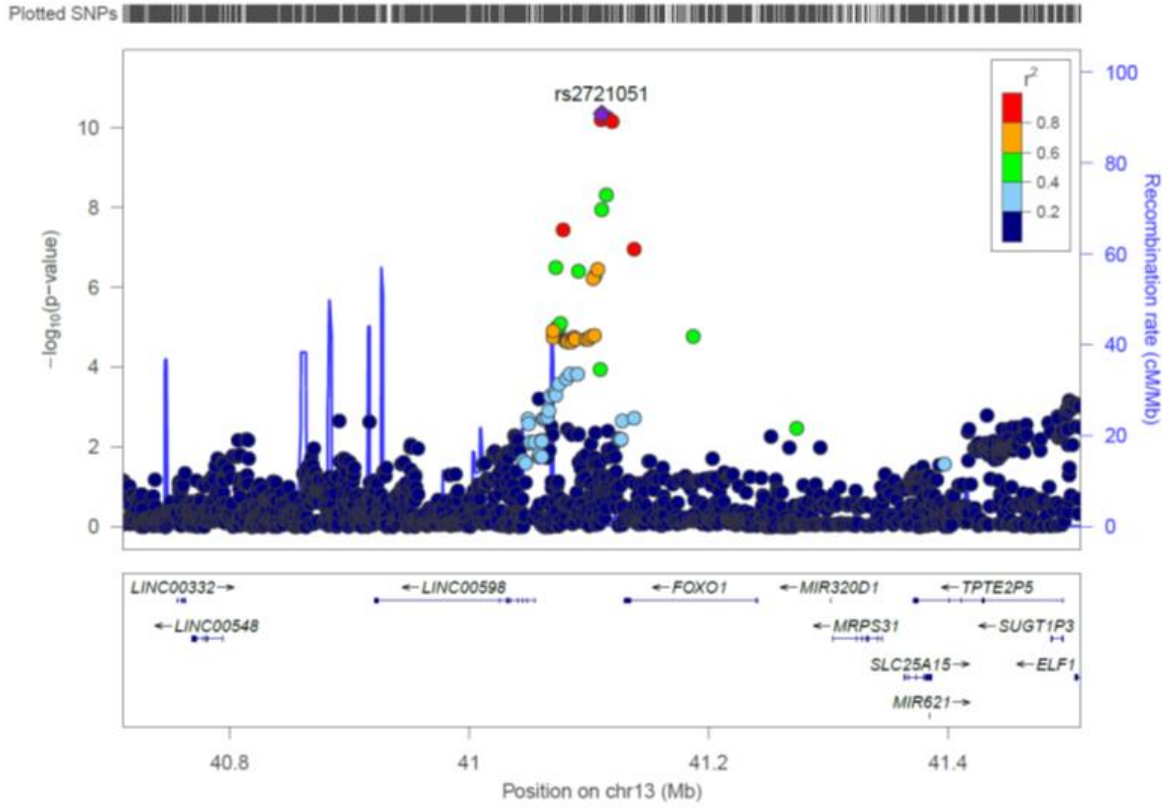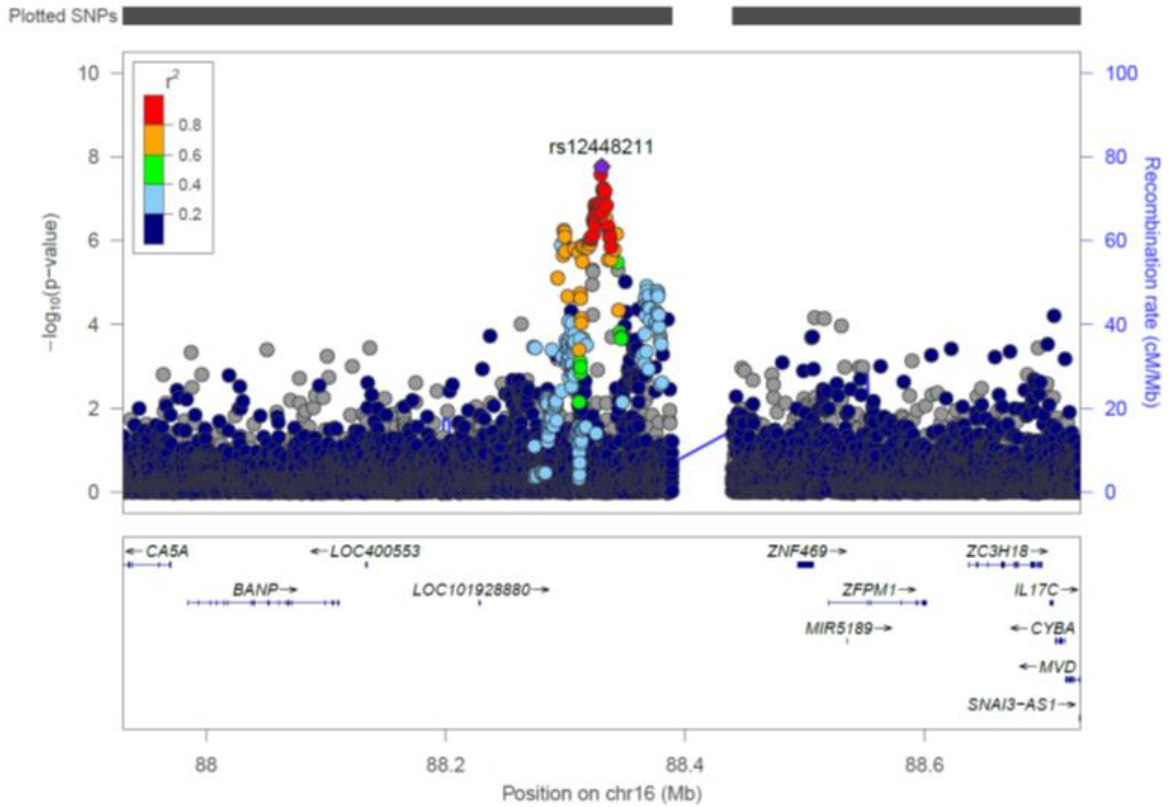

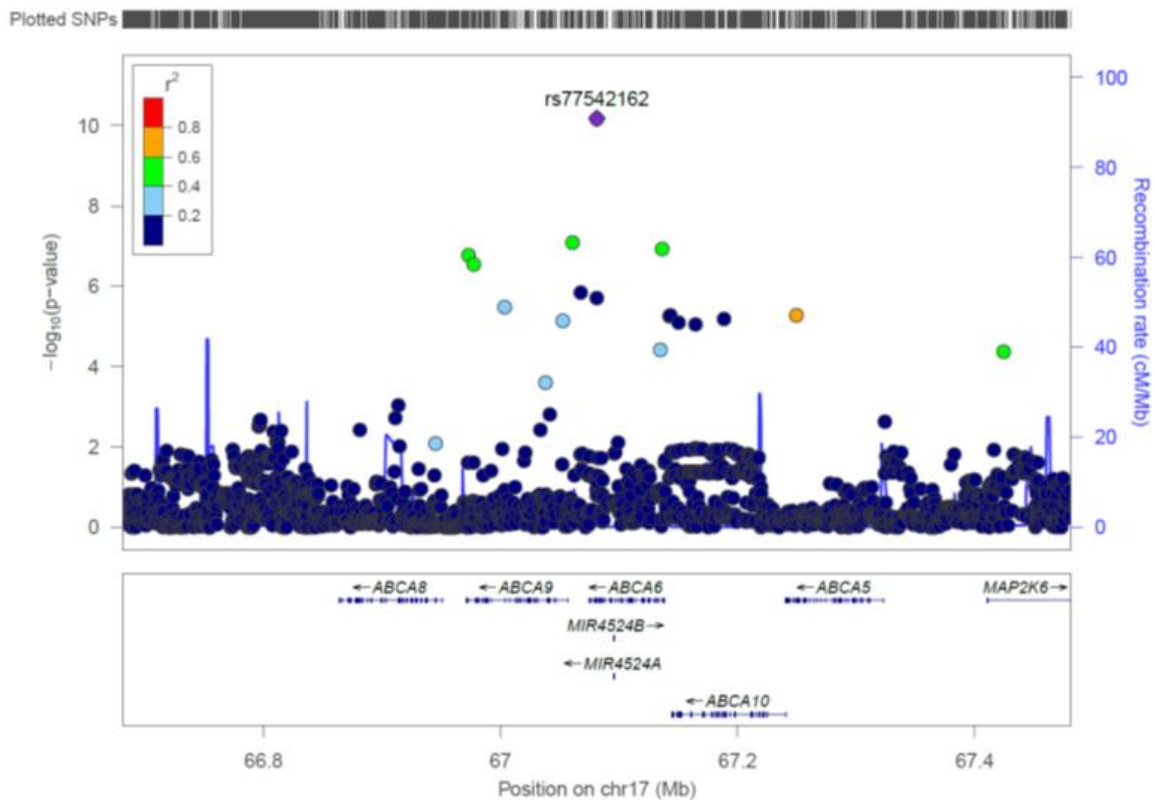



**eFigure 3.** LocusZoom Plots for Significant Loci From the GWAS Meta-analysis of Corneal Resistance Factor in EPIC-Norfolk and TwinsUK

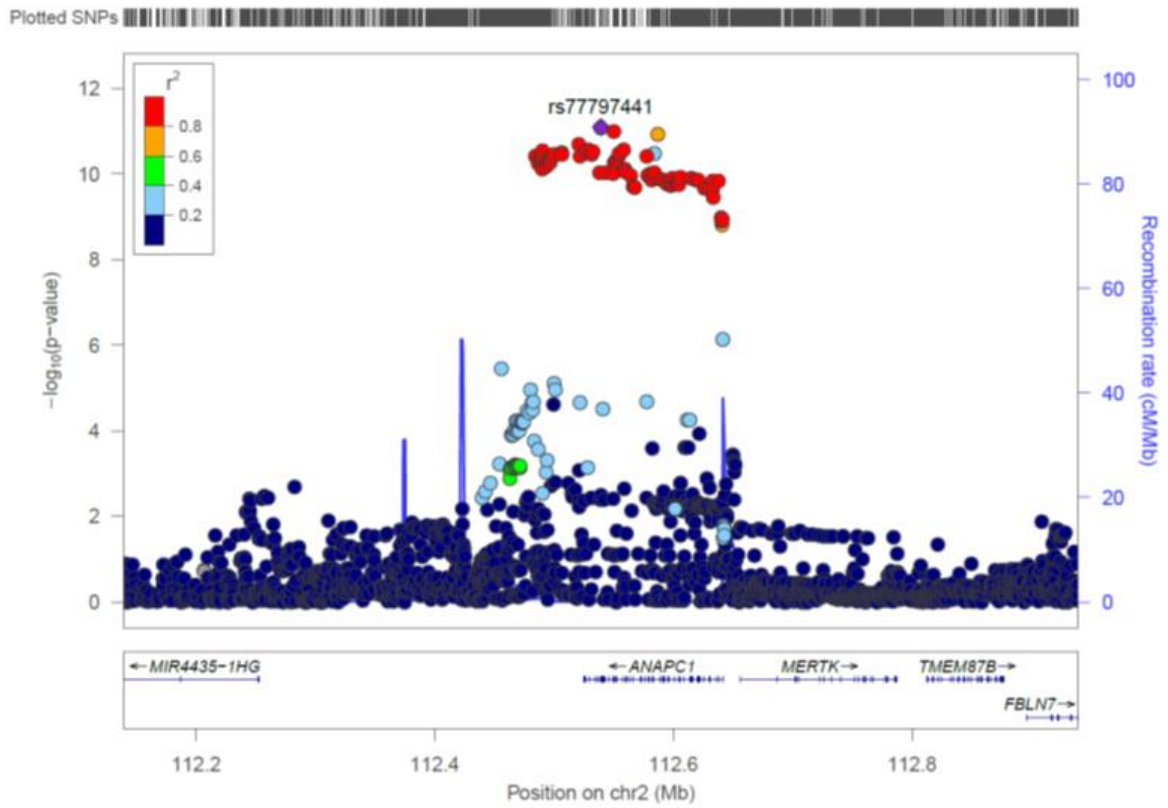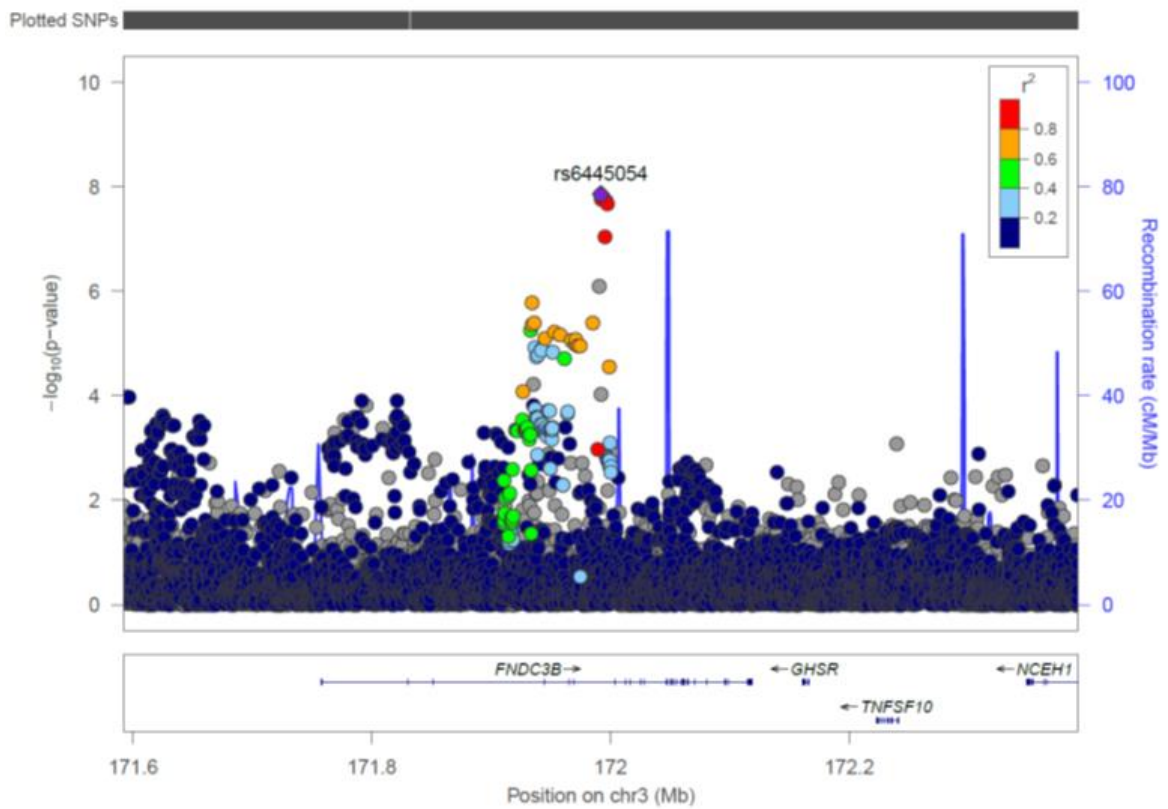

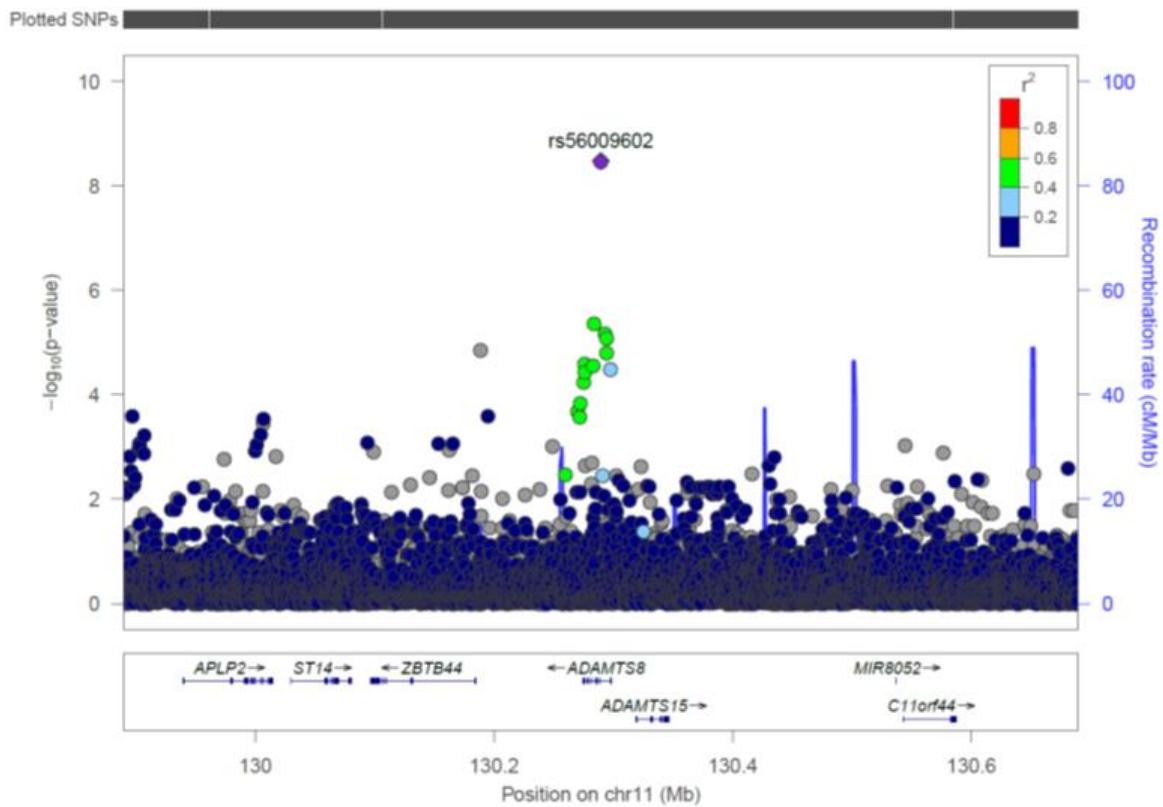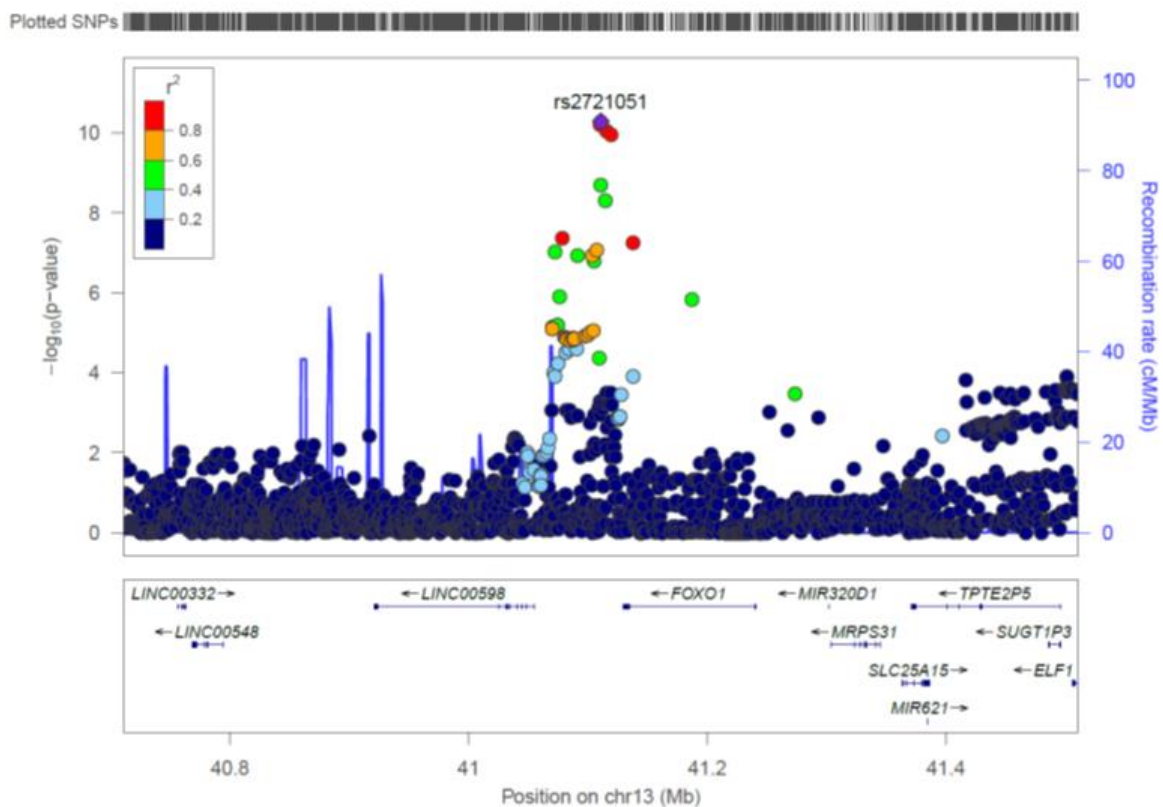

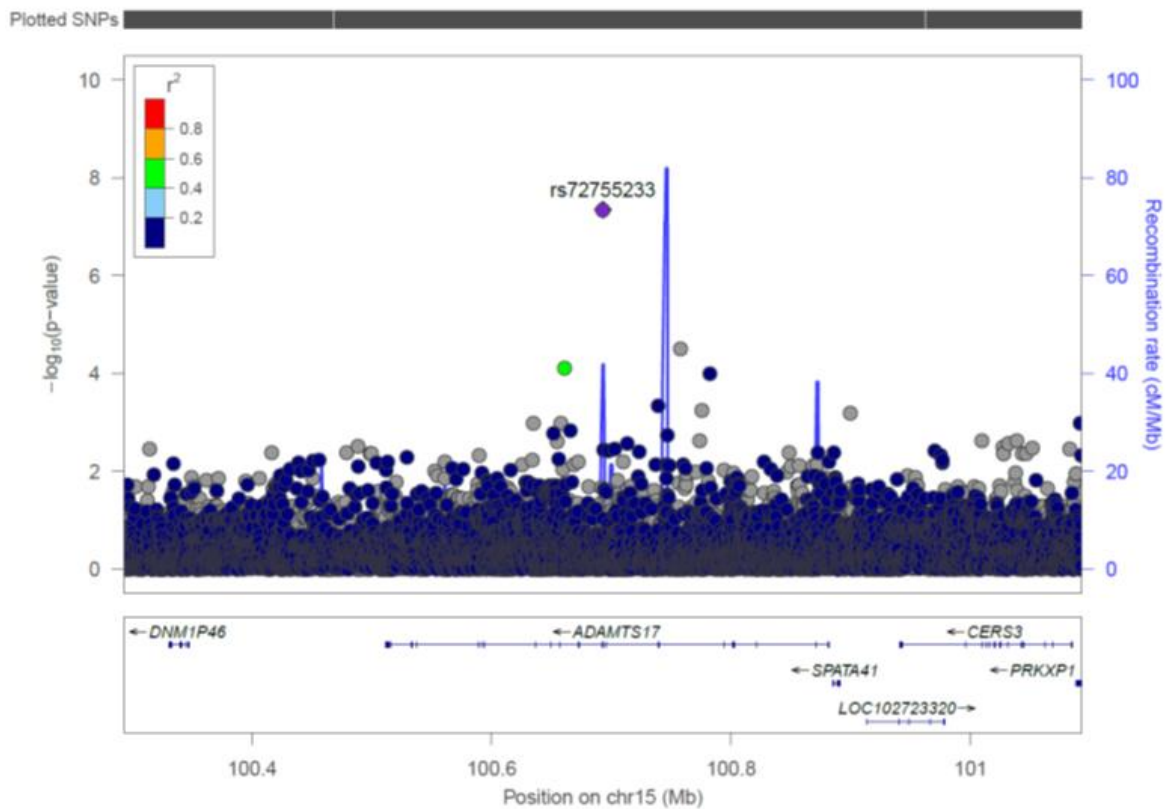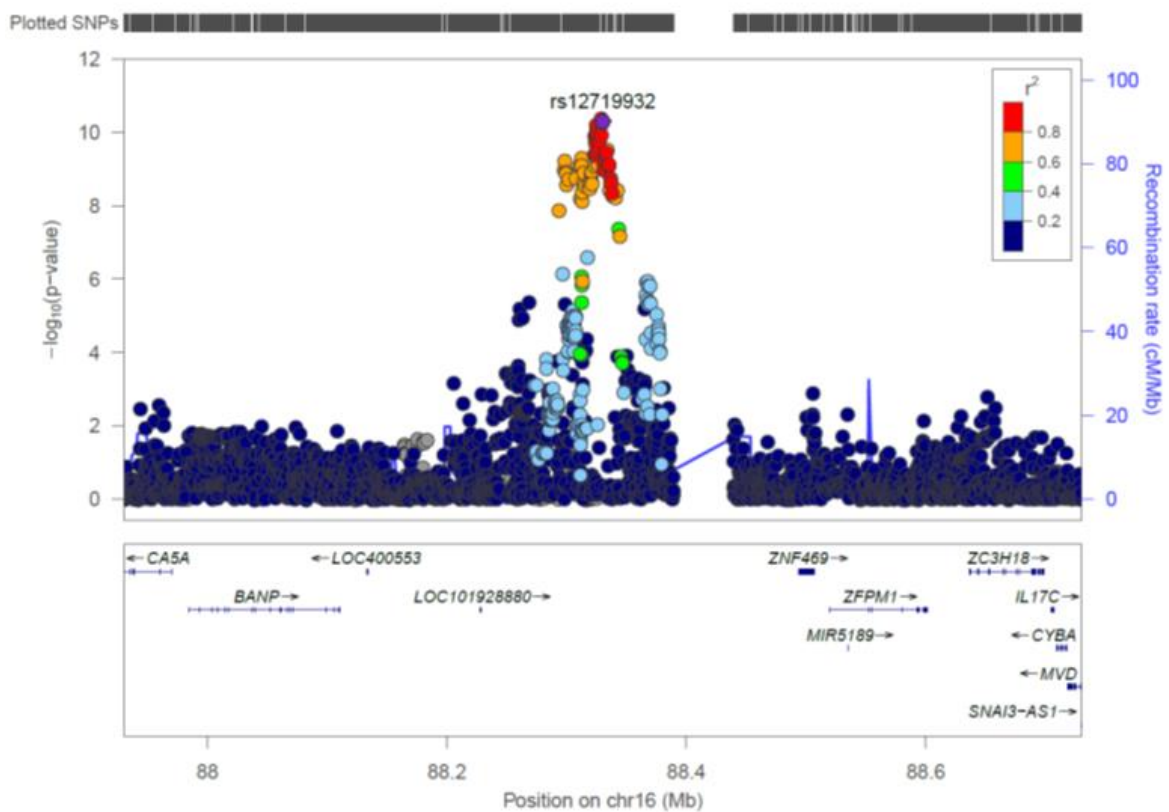

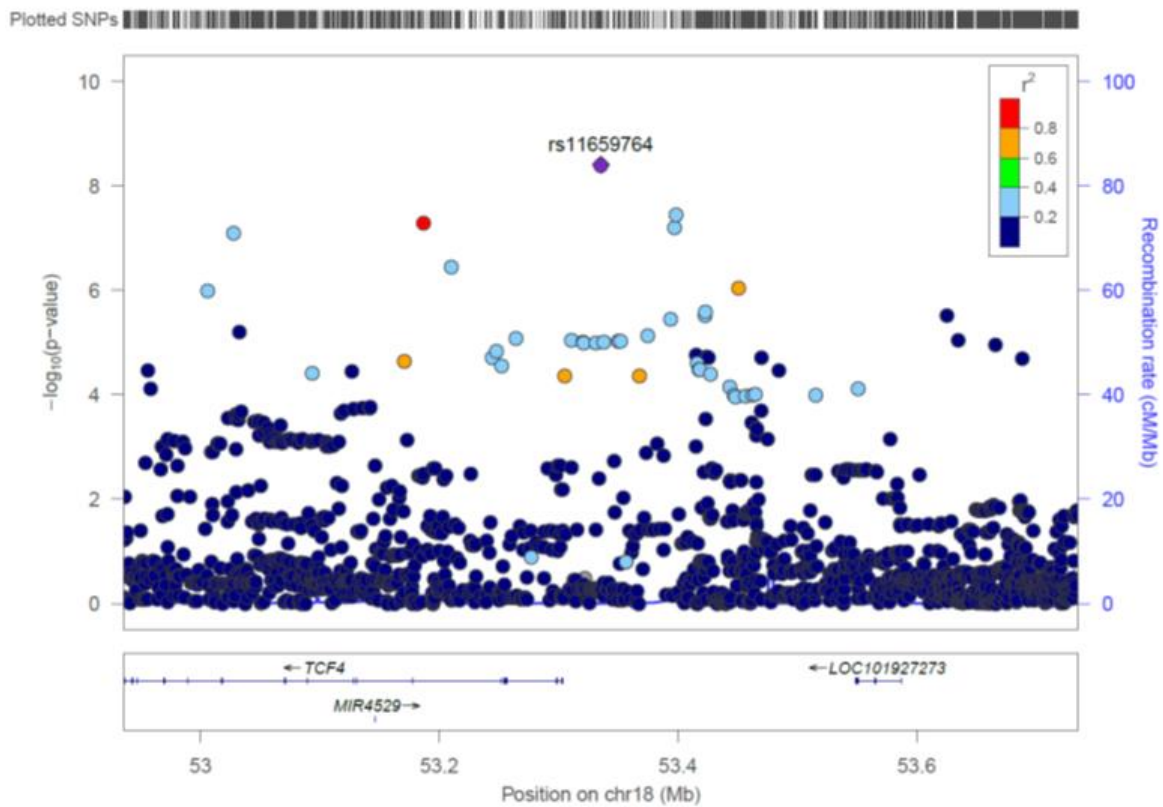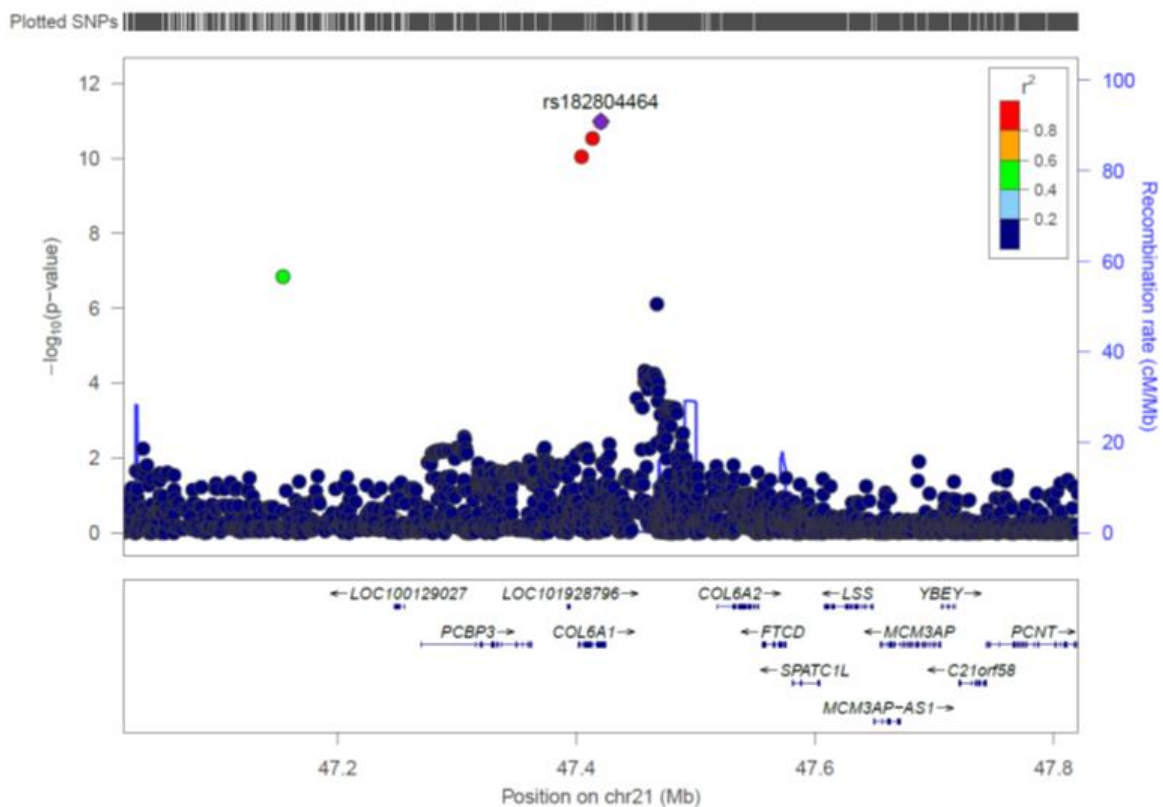

**eFigure 4.** Associations of Loci With Keratoconus

Results are for 752 keratoconus patients compared with either sequenced TwinsUK controls (n=974) or genotyped/imputed EPIC-Norfolk controls (n=13,828). The odds ratio and 95% confidence interval are plotted for each association. The power for detecting an odds ratio of 1.2 per effect allele with  $\alpha = 0.05$  is shown in red, adjacent to each effect estimate.

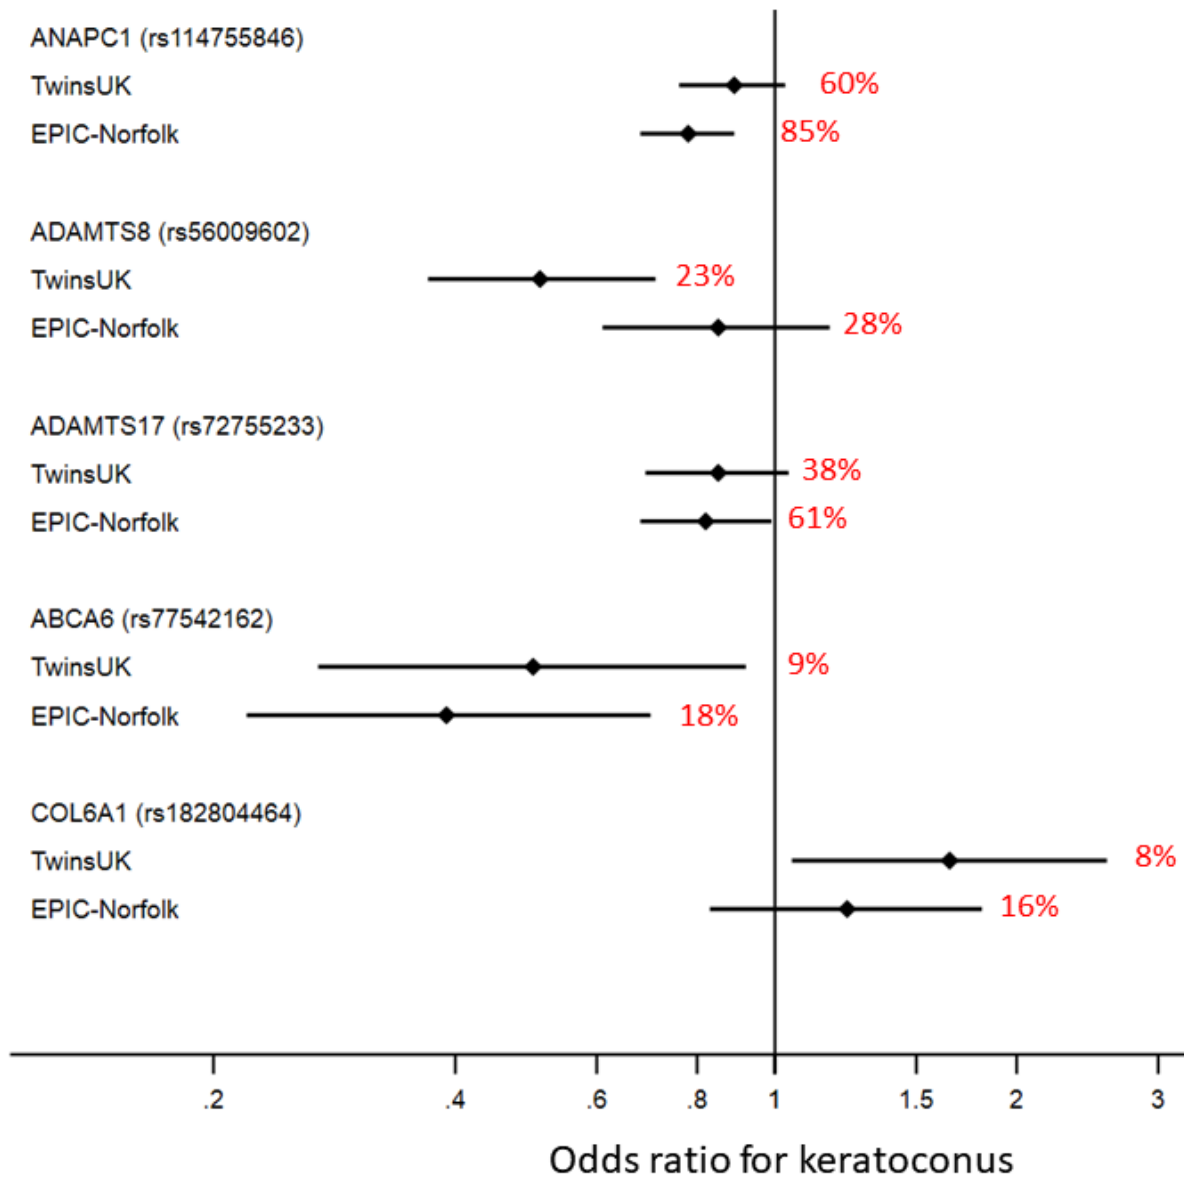

**eTable 1.** Genome-wide Significant SNPs From Corneal Hysteresis GWAS in EPIC-Norfolk

Alternate shading is used to highlight different loci, and the nearest gene at each locus is presented.

| rs ID       | Chr | Position  | Nearest gene to locus | Effect Allele | Other Allele | Frequency of Effect Allele | Hardy-Weinberg equilibrium <i>P</i> -value | Imputation info score | Beta  | Standard error | <i>P</i> -value |
|-------------|-----|-----------|-----------------------|---------------|--------------|----------------------------|--------------------------------------------|-----------------------|-------|----------------|-----------------|
| rs202110867 | 2   | 112550325 | <i>ANAPC1</i>         | G             | C            | 0.236                      | 0.455                                      | 0.982                 | 0.209 | 0.031          | 2.25E-11        |
| rs78658973  | 2   | 112484525 | <i>ANAPC1</i>         | A             | T            | 0.232                      | 0.630                                      | 0.957                 | 0.206 | 0.032          | 8.97E-11        |
| 2:112520793 | 2   | 112520793 | <i>ANAPC1</i>         | G             | A            | 0.235                      | 0.759                                      | 0.994                 | 0.201 | 0.031          | 8.98E-11        |
| rs142498660 | 2   | 112484861 | <i>ANAPC1</i>         | T             | C            | 0.232                      | 0.654                                      | 0.957                 | 0.206 | 0.032          | 9.03E-11        |
| rs114755846 | 2   | 112520920 | <i>ANAPC1</i>         | T             | A            | 0.235                      | 0.838                                      | 0.996                 | 0.201 | 0.031          | 9.52E-11        |
| rs114204453 | 2   | 112486894 | <i>ANAPC1</i>         | A             | G            | 0.232                      | 0.629                                      | 0.959                 | 0.206 | 0.032          | 1.01E-10        |
| rs12612620  | 2   | 112488876 | <i>ANAPC1</i>         | A             | G            | 0.231                      | 0.654                                      | 0.962                 | 0.205 | 0.032          | 1.04E-10        |
| rs371809230 | 2   | 112489416 | <i>ANAPC1</i>         | A             | G            | 0.231                      | 0.654                                      | 0.962                 | 0.205 | 0.032          | 1.08E-10        |
| rs201205018 | 2   | 112490128 | <i>ANAPC1</i>         | A             | G            | 0.231                      | 0.629                                      | 0.964                 | 0.205 | 0.032          | 1.15E-10        |
| rs72823440  | 2   | 112490418 | <i>ANAPC1</i>         | A             | G            | 0.231                      | 0.654                                      | 0.964                 | 0.205 | 0.032          | 1.16E-10        |
| rs77403931  | 2   | 112490371 | <i>ANAPC1</i>         | G             | C            | 0.229                      | 0.677                                      | 0.962                 | 0.205 | 0.032          | 1.22E-10        |
| rs201175214 | 2   | 112559582 | <i>ANAPC1</i>         | G             | A            | 0.242                      | 0.593                                      | 0.996                 | 0.198 | 0.031          | 1.24E-10        |
| rs200015423 | 2   | 112558479 | <i>ANAPC1</i>         | G             | A            | 0.231                      | 0.730                                      | 0.995                 | 0.201 | 0.031          | 1.28E-10        |
| rs199891994 | 2   | 112495314 | <i>ANAPC1</i>         | D             | I            | 0.228                      | 0.577                                      | 0.976                 | 0.204 | 0.032          | 1.35E-10        |
| rs77797441  | 2   | 112539384 | <i>ANAPC1</i>         | T             | C            | 0.223                      | 0.859                                      | 0.973                 | 0.205 | 0.032          | 1.35E-10        |
| rs142711068 | 2   | 112560090 | <i>ANAPC1</i>         | A             | G            | 0.242                      | 0.570                                      | 0.996                 | 0.197 | 0.031          | 1.42E-10        |
| rs77856773  | 2   | 112493835 | <i>ANAPC1</i>         | D             | I            | 0.231                      | 0.629                                      | 0.971                 | 0.203 | 0.032          | 1.47E-10        |
| rs12992603  | 2   | 112598534 | <i>ANAPC1</i>         | G             | C            | 0.245                      | 0.551                                      | 0.992                 | 0.197 | 0.031          | 1.52E-10        |
| rs145274367 | 2   | 112494600 | <i>ANAPC1</i>         | A             | C            | 0.231                      | 0.628                                      | 0.973                 | 0.202 | 0.032          | 1.54E-10        |
| rs187091502 | 2   | 112577962 | <i>ANAPC1</i>         | T             | C            | 0.228                      | 0.780                                      | 0.980                 | 0.202 | 0.032          | 1.57E-10        |
| rs149542794 | 2   | 112496121 | <i>ANAPC1</i>         | A             | T            | 0.231                      | 0.628                                      | 0.978                 | 0.202 | 0.032          | 1.68E-10        |
| rs76210128  | 2   | 112532987 | <i>ANAPC1</i>         | T             | C            | 0.231                      | 0.704                                      | 0.998                 | 0.199 | 0.031          | 1.71E-10        |

|             |   |           |        |   |   |       |       |       |       |       |          |
|-------------|---|-----------|--------|---|---|-------|-------|-------|-------|-------|----------|
| rs79671094  | 2 | 112531691 | ANAPC1 | A | G | 0.227 | 0.726 | 0.986 | 0.202 | 0.032 | 1.73E-10 |
| rs137999262 | 2 | 112526866 | ANAPC1 | A | G | 0.230 | 0.533 | 1.000 | 0.199 | 0.031 | 1.81E-10 |
| rs202074374 | 2 | 112564426 | ANAPC1 | C | A | 0.243 | 0.689 | 0.995 | 0.196 | 0.031 | 1.81E-10 |
| rs200632716 | 2 | 112496958 | ANAPC1 | A | C | 0.231 | 0.628 | 0.981 | 0.201 | 0.031 | 1.84E-10 |
| rs71226248  | 2 | 112506511 | ANAPC1 | T | C | 0.231 | 0.653 | 0.999 | 0.199 | 0.031 | 1.85E-10 |
| rs74267315  | 2 | 112498114 | ANAPC1 | G | A | 0.230 | 0.678 | 0.981 | 0.201 | 0.031 | 1.85E-10 |
| rs147346361 | 2 | 112529050 | ANAPC1 | G | A | 0.231 | 0.704 | 0.998 | 0.199 | 0.031 | 1.87E-10 |
| rs66739581  | 2 | 112580971 | ANAPC1 | C | T | 0.250 | 0.743 | 1.000 | 0.193 | 0.030 | 1.97E-10 |
| rs141660957 | 2 | 112554577 | ANAPC1 | T | C | 0.232 | 0.704 | 0.994 | 0.198 | 0.031 | 2.17E-10 |
| rs72823439  | 2 | 112490328 | ANAPC1 | G | T | 0.232 | 0.630 | 0.957 | 0.202 | 0.032 | 2.18E-10 |
| rs190739040 | 2 | 112552427 | ANAPC1 | T | C | 0.230 | 0.653 | 0.994 | 0.199 | 0.031 | 2.22E-10 |
| rs200623464 | 2 | 112554527 | ANAPC1 | T | G | 0.231 | 0.730 | 0.994 | 0.198 | 0.031 | 2.27E-10 |
| rs199566275 | 2 | 112513759 | ANAPC1 | D | I | 0.309 | 0.752 | 0.814 | 0.199 | 0.031 | 2.31E-10 |
| 2:112562511 | 2 | 112562511 | ANAPC1 | D | I | 0.226 | 1.000 | 0.990 | 0.200 | 0.031 | 2.33E-10 |
| rs201128688 | 2 | 112566517 | ANAPC1 | T | C | 0.243 | 0.689 | 0.995 | 0.195 | 0.031 | 2.34E-10 |
| rs17040773  | 2 | 112500035 | ANAPC1 | C | A | 0.231 | 0.730 | 1.000 | 0.197 | 0.031 | 2.41E-10 |
| rs60136848  | 2 | 112582766 | ANAPC1 | D | I | 0.243 | 0.689 | 0.997 | 0.194 | 0.031 | 2.53E-10 |
| rs17835589  | 2 | 112641149 | ANAPC1 | C | G | 0.263 | 0.728 | 0.981 | 0.190 | 0.030 | 2.55E-10 |
| rs150306256 | 2 | 112506733 | ANAPC1 | C | T | 0.231 | 0.653 | 0.998 | 0.197 | 0.031 | 2.57E-10 |
| rs200237198 | 2 | 112543419 | ANAPC1 | I | D | 0.231 | 0.782 | 0.994 | 0.198 | 0.031 | 2.60E-10 |
| rs201248064 | 2 | 112503166 | ANAPC1 | D | I | 0.231 | 0.604 | 0.999 | 0.197 | 0.031 | 2.63E-10 |
| rs80125903  | 2 | 112549693 | ANAPC1 | A | C | 0.246 | 0.551 | 0.991 | 0.194 | 0.031 | 2.68E-10 |
| rs200193771 | 2 | 112538247 | ANAPC1 | A | G | 0.245 | 0.529 | 0.993 | 0.194 | 0.031 | 2.75E-10 |
| rs2948006   | 2 | 112521945 | ANAPC1 | A | G | 0.231 | 0.678 | 0.996 | 0.197 | 0.031 | 2.76E-10 |
| rs78676279  | 2 | 112543377 | ANAPC1 | T | C | 0.247 | 0.488 | 0.989 | 0.194 | 0.031 | 2.90E-10 |
| rs201578686 | 2 | 112567884 | ANAPC1 | I | D | 0.230 | 0.890 | 0.993 | 0.197 | 0.031 | 3.06E-10 |
| rs192541479 | 2 | 112552967 | ANAPC1 | T | A | 0.230 | 0.729 | 0.992 | 0.197 | 0.031 | 3.10E-10 |
| rs11122983  | 2 | 112584291 | ANAPC1 | A | G | 0.232 | 0.810 | 0.996 | 0.196 | 0.031 | 3.10E-10 |



|             |   |           |        |   |   |       |       |       |       |       |          |
|-------------|---|-----------|--------|---|---|-------|-------|-------|-------|-------|----------|
| rs113870763 | 2 | 112567980 | ANAPC1 | C | T | 0.243 | 0.641 | 0.995 | 0.193 | 0.031 | 3.19E-10 |
| rs201709611 | 2 | 112567624 | ANAPC1 | G | C | 0.243 | 0.641 | 0.995 | 0.193 | 0.031 | 3.28E-10 |
| rs145628895 | 2 | 112503212 | ANAPC1 | D | I | 0.229 | 0.627 | 0.992 | 0.197 | 0.031 | 3.32E-10 |
| rs1548189   | 2 | 112633562 | ANAPC1 | T | G | 0.244 | 0.714 | 0.993 | 0.193 | 0.031 | 3.58E-10 |
| rs201745139 | 2 | 112578794 | ANAPC1 | C | T | 0.232 | 0.836 | 0.997 | 0.195 | 0.031 | 3.85E-10 |
| rs12614297  | 2 | 112583476 | ANAPC1 | T | C | 0.232 | 0.836 | 0.997 | 0.195 | 0.031 | 3.93E-10 |
| rs11122990  | 2 | 112599436 | ANAPC1 | T | C | 0.232 | 0.783 | 0.994 | 0.195 | 0.031 | 4.09E-10 |
| rs74189873  | 2 | 112606330 | ANAPC1 | A | G | 0.232 | 0.783 | 0.995 | 0.195 | 0.031 | 4.15E-10 |
| rs3877249   | 2 | 112615253 | ANAPC1 | T | C | 0.232 | 0.809 | 0.993 | 0.195 | 0.031 | 4.27E-10 |
| rs13000524  | 2 | 112637867 | ANAPC1 | G | T | 0.233 | 0.837 | 0.990 | 0.195 | 0.031 | 4.30E-10 |
| rs76292584  | 2 | 112619067 | ANAPC1 | A | G | 0.232 | 0.783 | 0.994 | 0.195 | 0.031 | 4.35E-10 |
| rs11675449  | 2 | 112589080 | ANAPC1 | A | G | 0.232 | 0.810 | 0.996 | 0.194 | 0.031 | 4.38E-10 |
| rs11689168  | 2 | 112621199 | ANAPC1 | C | T | 0.232 | 0.783 | 0.994 | 0.194 | 0.031 | 4.47E-10 |
| rs80233695  | 2 | 112633047 | ANAPC1 | C | T | 0.232 | 0.810 | 0.993 | 0.195 | 0.031 | 4.51E-10 |
| rs72465872  | 2 | 112631396 | ANAPC1 | D | I | 0.232 | 0.783 | 0.993 | 0.194 | 0.031 | 4.53E-10 |
| rs11674974  | 2 | 112591840 | ANAPC1 | G | A | 0.232 | 0.810 | 0.996 | 0.194 | 0.031 | 4.54E-10 |
| rs150954153 | 2 | 112581910 | ANAPC1 | G | A | 0.232 | 0.809 | 0.996 | 0.194 | 0.031 | 4.79E-10 |
| rs71414609  | 2 | 112640229 | ANAPC1 | A | G | 0.251 | 0.535 | 0.980 | 0.189 | 0.030 | 4.79E-10 |
| rs11683345  | 2 | 112597057 | ANAPC1 | T | C | 0.232 | 0.810 | 0.996 | 0.194 | 0.031 | 4.94E-10 |
| rs71414610  | 2 | 112641266 | ANAPC1 | C | G | 0.251 | 0.514 | 0.979 | 0.189 | 0.030 | 4.98E-10 |
| rs10779879  | 2 | 112603408 | ANAPC1 | T | C | 0.232 | 0.810 | 0.996 | 0.194 | 0.031 | 5.22E-10 |
| rs202059764 | 2 | 112578488 | ANAPC1 | D | I | 0.230 | 0.835 | 0.990 | 0.195 | 0.031 | 5.32E-10 |
| rs35533505  | 2 | 112640543 | ANAPC1 | C | G | 0.251 | 0.557 | 0.980 | 0.189 | 0.030 | 5.57E-10 |
| rs35212506  | 2 | 112594570 | ANAPC1 | G | C | 0.232 | 0.783 | 0.996 | 0.193 | 0.031 | 5.64E-10 |
| rs71385842  | 2 | 112628534 | ANAPC1 | D | I | 0.232 | 0.810 | 0.994 | 0.193 | 0.031 | 5.83E-10 |
| rs74182847  | 2 | 112604183 | ANAPC1 | G | A | 0.232 | 0.810 | 0.995 | 0.193 | 0.031 | 5.93E-10 |
| rs71252597  | 2 | 112492986 | ANAPC1 | C | T | 0.210 | 0.912 | 0.925 | 0.207 | 0.033 | 5.95E-10 |
| rs71413401  | 2 | 112604685 | ANAPC1 | C | T | 0.232 | 0.809 | 0.996 | 0.193 | 0.031 | 6.04E-10 |



|             |    |           |               |   |   |       |       |       |        |       |          |
|-------------|----|-----------|---------------|---|---|-------|-------|-------|--------|-------|----------|
| rs12617909  | 2  | 112598119 | <i>ANAPC1</i> | T | C | 0.233 | 0.918 | 0.995 | 0.192  | 0.031 | 6.22E-10 |
| rs113894504 | 2  | 112633092 | <i>ANAPC1</i> | G | C | 0.232 | 0.783 | 0.993 | 0.193  | 0.031 | 6.67E-10 |
| rs34432308  | 2  | 112626193 | <i>ANAPC1</i> | T | C | 0.232 | 0.783 | 0.994 | 0.193  | 0.031 | 6.78E-10 |
| rs35366113  | 2  | 112629488 | <i>ANAPC1</i> | A | T | 0.232 | 0.757 | 0.994 | 0.193  | 0.031 | 6.81E-10 |
| rs189319935 | 2  | 112550621 | <i>ANAPC1</i> | G | A | 0.216 | 0.612 | 0.959 | 0.200  | 0.032 | 6.81E-10 |
| rs138238351 | 2  | 112610564 | <i>ANAPC1</i> | D | I | 0.231 | 0.863 | 0.992 | 0.193  | 0.031 | 6.98E-10 |
| rs11674795  | 2  | 112602249 | <i>ANAPC1</i> | T | A | 0.232 | 0.757 | 0.995 | 0.192  | 0.031 | 6.98E-10 |
| rs7580454   | 2  | 112587099 | <i>ANAPC1</i> | T | C | 0.309 | 0.262 | 0.968 | 0.179  | 0.029 | 7.61E-10 |
| rs143231698 | 2  | 112493732 | <i>ANAPC1</i> | G | A | 0.211 | 0.941 | 0.926 | 0.205  | 0.033 | 8.73E-10 |
| rs201695274 | 2  | 112617985 | <i>ANAPC1</i> | I | D | 0.207 | 0.765 | 0.923 | 0.204  | 0.034 | 1.41E-09 |
| rs34739497  | 2  | 112625267 | <i>ANAPC1</i> | D | I | 0.320 | 0.398 | 0.917 | 0.171  | 0.029 | 7.07E-09 |
| rs56307072  | 2  | 112584242 | <i>ANAPC1</i> | T | A | 0.329 | 0.420 | 0.841 | 0.169  | 0.031 | 3.09E-08 |
| rs2721051   | 13 | 41110884  | <i>FOXO1</i>  | T | C | 0.108 | 0.751 | 1.000 | -0.248 | 0.042 | 4.06E-09 |
| rs148496467 | 13 | 41112152  | <i>FOXO1</i>  | I | D | 0.108 | 0.751 | 0.999 | -0.247 | 0.042 | 4.48E-09 |
| rs2755238   | 13 | 41110270  | <i>FOXO1</i>  | C | T | 0.108 | 0.849 | 0.998 | -0.246 | 0.042 | 5.38E-09 |
| rs2701857   | 13 | 41115586  | <i>FOXO1</i>  | C | A | 0.108 | 0.750 | 0.996 | -0.246 | 0.042 | 5.66E-09 |
| rs11616662  | 13 | 41119466  | <i>FOXO1</i>  | A | G | 0.108 | 0.751 | 0.990 | -0.244 | 0.042 | 7.93E-09 |
| rs79728429  | 13 | 41114572  | <i>FOXO1</i>  | T | C | 0.065 | 0.267 | 1.000 | -0.288 | 0.053 | 4.61E-08 |
| rs77542162  | 17 | 67081278  | <i>ABCA6</i>  | G | A | 0.021 | 1.000 | 1.000 | 0.613  | 0.092 | 2.55E-11 |

**eTable 2.** Genome-wide Significant SNPs From Corneal Resistance Factor GWAS in EPIC-Norfolk

Alternate shading is used to highlight different loci, and the nearest gene at each locus is presented.

| rs ID       | Chr | Position  | Nearest gene at locus | Effect Allele | Other Allele | Frequency of Effect Allele | Hardy-Weinberg equilibrium <i>P</i> -value | Imputation info score | Beta  | Standard error | <i>P</i> -value |
|-------------|-----|-----------|-----------------------|---------------|--------------|----------------------------|--------------------------------------------|-----------------------|-------|----------------|-----------------|
| rs77797441  | 2   | 112539384 | <i>ANAPC1</i>         | T             | C            | 0.223                      | 0.859                                      | 0.973                 | 0.218 | 0.035          | 5.11E-10        |
| rs202110867 | 2   | 112550325 | <i>ANAPC1</i>         | G             | C            | 0.236                      | 0.455                                      | 0.982                 | 0.212 | 0.034          | 7.14E-10        |
| 2:112520793 | 2   | 112520793 | <i>ANAPC1</i>         | G             | A            | 0.235                      | 0.759                                      | 0.994                 | 0.206 | 0.034          | 1.42E-09        |
| rs114755846 | 2   | 112520920 | <i>ANAPC1</i>         | T             | A            | 0.235                      | 0.838                                      | 0.996                 | 0.205 | 0.034          | 1.92E-09        |
| rs200015423 | 2   | 112558479 | <i>ANAPC1</i>         | G             | A            | 0.231                      | 0.730                                      | 0.995                 | 0.206 | 0.034          | 2.08E-09        |
| rs77403931  | 2   | 112490371 | <i>ANAPC1</i>         | G             | C            | 0.229                      | 0.677                                      | 0.962                 | 0.210 | 0.035          | 2.15E-09        |
| rs147346361 | 2   | 112529050 | <i>ANAPC1</i>         | G             | A            | 0.231                      | 0.704                                      | 0.998                 | 0.205 | 0.034          | 2.38E-09        |
| rs17040773  | 2   | 112500035 | <i>ANAPC1</i>         | C             | A            | 0.231                      | 0.730                                      | 1.000                 | 0.204 | 0.034          | 2.40E-09        |
| rs78658973  | 2   | 112484525 | <i>ANAPC1</i>         | A             | T            | 0.232                      | 0.630                                      | 0.957                 | 0.209 | 0.035          | 2.43E-09        |
| rs71226248  | 2   | 112506511 | <i>ANAPC1</i>         | T             | C            | 0.231                      | 0.653                                      | 0.999                 | 0.205 | 0.034          | 2.43E-09        |
| rs76210128  | 2   | 112532987 | <i>ANAPC1</i>         | T             | C            | 0.231                      | 0.704                                      | 0.998                 | 0.204 | 0.034          | 2.49E-09        |
| rs137999262 | 2   | 112526866 | <i>ANAPC1</i>         | A             | G            | 0.230                      | 0.533                                      | 1.000                 | 0.205 | 0.034          | 2.49E-09        |
| rs12612620  | 2   | 112488876 | <i>ANAPC1</i>         | A             | G            | 0.231                      | 0.654                                      | 0.962                 | 0.208 | 0.035          | 2.50E-09        |
| rs142498660 | 2   | 112484861 | <i>ANAPC1</i>         | T             | C            | 0.232                      | 0.654                                      | 0.957                 | 0.208 | 0.035          | 2.52E-09        |
| rs371809230 | 2   | 112489416 | <i>ANAPC1</i>         | A             | G            | 0.231                      | 0.654                                      | 0.962                 | 0.208 | 0.035          | 2.59E-09        |
| rs141660957 | 2   | 112554577 | <i>ANAPC1</i>         | T             | C            | 0.232                      | 0.704                                      | 0.994                 | 0.204 | 0.034          | 2.69E-09        |
| rs145628895 | 2   | 112503212 | <i>ANAPC1</i>         | D             | I            | 0.229                      | 0.627                                      | 0.992                 | 0.205 | 0.034          | 2.72E-09        |
| rs150306256 | 2   | 112506733 | <i>ANAPC1</i>         | C             | T            | 0.231                      | 0.653                                      | 0.998                 | 0.204 | 0.034          | 2.75E-09        |
| rs72823440  | 2   | 112490418 | <i>ANAPC1</i>         | A             | G            | 0.231                      | 0.654                                      | 0.964                 | 0.207 | 0.035          | 2.76E-09        |
| rs201248064 | 2   | 112503166 | <i>ANAPC1</i>         | D             | I            | 0.231                      | 0.604                                      | 0.999                 | 0.204 | 0.034          | 2.77E-09        |
| rs71252597  | 2   | 112492986 | <i>ANAPC1</i>         | C             | T            | 0.210                      | 0.912                                      | 0.925                 | 0.218 | 0.037          | 2.79E-09        |
| rs56307072  | 2   | 112584242 | <i>ANAPC1</i>         | T             | A            | 0.329                      | 0.420                                      | 0.841                 | 0.200 | 0.034          | 2.87E-09        |

|             |   |           |        |   |   |       |       |       |       |       |          |
|-------------|---|-----------|--------|---|---|-------|-------|-------|-------|-------|----------|
| rs74267315  | 2 | 112498114 | ANAPC1 | G | A | 0.230 | 0.678 | 0.981 | 0.205 | 0.035 | 3.04E-09 |
| rs2948006   | 2 | 112521945 | ANAPC1 | A | G | 0.231 | 0.678 | 0.996 | 0.204 | 0.034 | 3.04E-09 |
| rs200623464 | 2 | 112554527 | ANAPC1 | T | G | 0.231 | 0.730 | 0.994 | 0.203 | 0.034 | 3.07E-09 |
| rs187091502 | 2 | 112577962 | ANAPC1 | T | C | 0.228 | 0.780 | 0.980 | 0.206 | 0.035 | 3.16E-09 |
| rs199891994 | 2 | 112495314 | ANAPC1 | D | I | 0.228 | 0.577 | 0.976 | 0.206 | 0.035 | 3.23E-09 |
| rs200237198 | 2 | 112543419 | ANAPC1 | I | D | 0.231 | 0.782 | 0.994 | 0.203 | 0.034 | 3.31E-09 |
| rs143231698 | 2 | 112493732 | ANAPC1 | G | A | 0.211 | 0.941 | 0.926 | 0.217 | 0.037 | 3.34E-09 |
| rs190739040 | 2 | 112552427 | ANAPC1 | T | C | 0.230 | 0.653 | 0.994 | 0.203 | 0.034 | 3.44E-09 |
| rs114204453 | 2 | 112486894 | ANAPC1 | A | G | 0.232 | 0.629 | 0.959 | 0.207 | 0.035 | 3.46E-09 |
| rs201205018 | 2 | 112490128 | ANAPC1 | A | G | 0.231 | 0.629 | 0.964 | 0.206 | 0.035 | 3.51E-09 |
| rs145274367 | 2 | 112494600 | ANAPC1 | A | C | 0.231 | 0.628 | 0.973 | 0.205 | 0.035 | 3.66E-09 |
| rs79671094  | 2 | 112531691 | ANAPC1 | A | G | 0.227 | 0.726 | 0.986 | 0.205 | 0.035 | 3.67E-09 |
| rs149542794 | 2 | 112496121 | ANAPC1 | A | T | 0.231 | 0.628 | 0.978 | 0.204 | 0.035 | 4.08E-09 |
| rs200632716 | 2 | 112496958 | ANAPC1 | A | C | 0.231 | 0.628 | 0.981 | 0.203 | 0.035 | 4.39E-09 |
| rs77856773  | 2 | 112493835 | ANAPC1 | D | I | 0.231 | 0.629 | 0.971 | 0.204 | 0.035 | 4.46E-09 |
| rs192541479 | 2 | 112552967 | ANAPC1 | T | A | 0.230 | 0.729 | 0.992 | 0.202 | 0.034 | 4.52E-09 |
| rs201175214 | 2 | 112559582 | ANAPC1 | G | A | 0.242 | 0.593 | 0.996 | 0.198 | 0.034 | 4.69E-09 |
| 2:112562511 | 2 | 112562511 | ANAPC1 | D | I | 0.226 | 1.000 | 0.990 | 0.202 | 0.035 | 5.42E-09 |
| rs200193771 | 2 | 112538247 | ANAPC1 | A | G | 0.245 | 0.529 | 0.993 | 0.196 | 0.034 | 5.77E-09 |
| rs142711068 | 2 | 112560090 | ANAPC1 | A | G | 0.242 | 0.570 | 0.996 | 0.197 | 0.034 | 5.78E-09 |
| rs80125903  | 2 | 112549693 | ANAPC1 | A | C | 0.246 | 0.551 | 0.991 | 0.196 | 0.034 | 6.01E-09 |
| rs78676279  | 2 | 112543377 | ANAPC1 | T | C | 0.247 | 0.488 | 0.989 | 0.196 | 0.034 | 6.32E-09 |
| rs72823439  | 2 | 112490328 | ANAPC1 | G | T | 0.232 | 0.630 | 0.957 | 0.203 | 0.035 | 6.38E-09 |
| rs202074374 | 2 | 112564426 | ANAPC1 | C | A | 0.243 | 0.689 | 0.995 | 0.196 | 0.034 | 6.67E-09 |
| rs11122983  | 2 | 112584291 | ANAPC1 | A | G | 0.232 | 0.810 | 0.996 | 0.198 | 0.034 | 7.05E-09 |
| rs189319935 | 2 | 112550621 | ANAPC1 | G | A | 0.216 | 0.612 | 0.959 | 0.206 | 0.036 | 7.84E-09 |
| rs13000524  | 2 | 112637867 | ANAPC1 | G | T | 0.233 | 0.837 | 0.990 | 0.198 | 0.034 | 8.10E-09 |
| rs3877249   | 2 | 112615253 | ANAPC1 | T | C | 0.232 | 0.809 | 0.993 | 0.198 | 0.034 | 8.14E-09 |

|             |   |           |        |   |   |       |       |       |       |       |          |
|-------------|---|-----------|--------|---|---|-------|-------|-------|-------|-------|----------|
| rs74189873  | 2 | 112606330 | ANAPC1 | A | G | 0.232 | 0.783 | 0.995 | 0.197 | 0.034 | 8.29E-09 |
| rs80233695  | 2 | 112633047 | ANAPC1 | C | T | 0.232 | 0.810 | 0.993 | 0.197 | 0.034 | 8.43E-09 |
| rs12992603  | 2 | 112598534 | ANAPC1 | G | C | 0.245 | 0.551 | 0.992 | 0.194 | 0.034 | 8.47E-09 |
| rs72465872  | 2 | 112631396 | ANAPC1 | D | I | 0.232 | 0.783 | 0.993 | 0.197 | 0.034 | 8.50E-09 |
| rs11689168  | 2 | 112621199 | ANAPC1 | C | T | 0.232 | 0.783 | 0.994 | 0.197 | 0.034 | 8.51E-09 |
| rs201745139 | 2 | 112578794 | ANAPC1 | C | T | 0.232 | 0.836 | 0.997 | 0.197 | 0.034 | 8.59E-09 |
| rs76292584  | 2 | 112619067 | ANAPC1 | A | G | 0.232 | 0.783 | 0.994 | 0.197 | 0.034 | 8.88E-09 |
| rs11122990  | 2 | 112599436 | ANAPC1 | T | C | 0.232 | 0.783 | 0.994 | 0.197 | 0.034 | 8.99E-09 |
| rs7580454   | 2 | 112587099 | ANAPC1 | T | C | 0.309 | 0.262 | 0.968 | 0.183 | 0.032 | 9.23E-09 |
| rs12614297  | 2 | 112583476 | ANAPC1 | T | C | 0.232 | 0.836 | 0.997 | 0.197 | 0.034 | 9.29E-09 |
| rs11675449  | 2 | 112589080 | ANAPC1 | A | G | 0.232 | 0.810 | 0.996 | 0.196 | 0.034 | 9.68E-09 |
| rs11674974  | 2 | 112591840 | ANAPC1 | G | A | 0.232 | 0.810 | 0.996 | 0.196 | 0.034 | 9.97E-09 |
| rs11683345  | 2 | 112597057 | ANAPC1 | T | C | 0.232 | 0.810 | 0.996 | 0.196 | 0.034 | 1.06E-08 |
| rs74182847  | 2 | 112604183 | ANAPC1 | G | A | 0.232 | 0.810 | 0.995 | 0.196 | 0.034 | 1.07E-08 |
| rs10779879  | 2 | 112603408 | ANAPC1 | T | C | 0.232 | 0.810 | 0.996 | 0.196 | 0.034 | 1.10E-08 |
| rs150954153 | 2 | 112581910 | ANAPC1 | G | A | 0.232 | 0.809 | 0.996 | 0.196 | 0.034 | 1.10E-08 |
| rs11674795  | 2 | 112602249 | ANAPC1 | T | A | 0.232 | 0.757 | 0.995 | 0.196 | 0.034 | 1.12E-08 |
| rs71385842  | 2 | 112628534 | ANAPC1 | D | I | 0.232 | 0.810 | 0.994 | 0.196 | 0.034 | 1.14E-08 |
| rs66739581  | 2 | 112580971 | ANAPC1 | C | T | 0.250 | 0.743 | 1.000 | 0.190 | 0.033 | 1.16E-08 |
| rs71414609  | 2 | 112640229 | ANAPC1 | A | G | 0.251 | 0.535 | 0.980 | 0.191 | 0.033 | 1.16E-08 |
| rs201578686 | 2 | 112567884 | ANAPC1 | I | D | 0.230 | 0.890 | 0.993 | 0.196 | 0.034 | 1.19E-08 |
| rs202059764 | 2 | 112578488 | ANAPC1 | D | I | 0.230 | 0.835 | 0.990 | 0.196 | 0.034 | 1.25E-08 |
| rs201128688 | 2 | 112566517 | ANAPC1 | T | C | 0.243 | 0.689 | 0.995 | 0.192 | 0.034 | 1.25E-08 |
| rs35212506  | 2 | 112594570 | ANAPC1 | G | C | 0.232 | 0.783 | 0.996 | 0.195 | 0.034 | 1.27E-08 |
| rs113870763 | 2 | 112567980 | ANAPC1 | C | T | 0.243 | 0.641 | 0.995 | 0.192 | 0.034 | 1.30E-08 |
| rs201709611 | 2 | 112567624 | ANAPC1 | G | C | 0.243 | 0.641 | 0.995 | 0.192 | 0.034 | 1.31E-08 |
| rs12617909  | 2 | 112598119 | ANAPC1 | T | C | 0.233 | 0.918 | 0.995 | 0.194 | 0.034 | 1.33E-08 |
| rs71414610  | 2 | 112641266 | ANAPC1 | C | G | 0.251 | 0.514 | 0.979 | 0.190 | 0.033 | 1.34E-08 |

|             |    |           |        |   |   |       |       |       |        |       |          |
|-------------|----|-----------|--------|---|---|-------|-------|-------|--------|-------|----------|
| rs71413401  | 2  | 112604685 | ANAPC1 | C | T | 0.232 | 0.809 | 0.996 | 0.194  | 0.034 | 1.37E-08 |
| rs35366113  | 2  | 112629488 | ANAPC1 | A | T | 0.232 | 0.757 | 0.994 | 0.195  | 0.034 | 1.40E-08 |
| rs60136848  | 2  | 112582766 | ANAPC1 | D | I | 0.243 | 0.689 | 0.997 | 0.191  | 0.034 | 1.41E-08 |
| rs113894504 | 2  | 112633092 | ANAPC1 | G | C | 0.232 | 0.783 | 0.993 | 0.194  | 0.034 | 1.42E-08 |
| rs34432308  | 2  | 112626193 | ANAPC1 | T | C | 0.232 | 0.783 | 0.994 | 0.194  | 0.034 | 1.45E-08 |
| rs35533505  | 2  | 112640543 | ANAPC1 | C | G | 0.251 | 0.557 | 0.980 | 0.189  | 0.033 | 1.46E-08 |
| rs17835589  | 2  | 112641149 | ANAPC1 | C | G | 0.263 | 0.728 | 0.981 | 0.187  | 0.033 | 1.48E-08 |
| rs138238351 | 2  | 112610564 | ANAPC1 | D | I | 0.231 | 0.863 | 0.992 | 0.194  | 0.034 | 1.68E-08 |
| rs1548189   | 2  | 112633562 | ANAPC1 | T | G | 0.244 | 0.714 | 0.993 | 0.190  | 0.034 | 1.69E-08 |
| rs34739497  | 2  | 112625267 | ANAPC1 | D | I | 0.320 | 0.398 | 0.917 | 0.182  | 0.032 | 2.01E-08 |
| rs201695274 | 2  | 112617985 | ANAPC1 | I | D | 0.207 | 0.765 | 0.923 | 0.203  | 0.037 | 4.40E-08 |
| rs2721051   | 13 | 41110884  | FOXO1  | T | C | 0.108 | 0.751 | 1.000 | -0.268 | 0.046 | 6.79E-09 |
| rs148496467 | 13 | 41112152  | FOXO1  | I | D | 0.108 | 0.751 | 0.999 | -0.267 | 0.046 | 8.03E-09 |
| rs2755238   | 13 | 41110270  | FOXO1  | C | T | 0.108 | 0.849 | 0.998 | -0.267 | 0.046 | 8.37E-09 |
| rs2701857   | 13 | 41115586  | FOXO1  | C | A | 0.108 | 0.750 | 0.996 | -0.265 | 0.046 | 1.10E-08 |
| rs11616662  | 13 | 41119466  | FOXO1  | A | G | 0.108 | 0.751 | 0.990 | -0.263 | 0.046 | 1.55E-08 |
| rs74948688  | 13 | 41110922  | FOXO1  | T | C | 0.071 | 0.926 | 0.984 | -0.311 | 0.056 | 3.27E-08 |
| rs79728429  | 13 | 41114572  | FOXO1  | T | C | 0.065 | 0.267 | 1.000 | -0.316 | 0.058 | 4.63E-08 |
| rs12719932  | 16 | 88330349  | ZNF469 | G | A | 0.637 | 0.105 | 0.991 | 0.182  | 0.030 | 9.39E-10 |
| rs12448211  | 16 | 88330513  | ZNF469 | A | G | 0.637 | 0.106 | 0.993 | 0.181  | 0.030 | 1.11E-09 |
| rs28378192  | 16 | 88329660  | ZNF469 | T | C | 0.636 | 0.124 | 0.990 | 0.181  | 0.030 | 1.18E-09 |
| rs28687756  | 16 | 88328928  | ZNF469 | G | T | 0.662 | 0.217 | 0.964 | 0.187  | 0.031 | 1.21E-09 |
| rs35193497  | 16 | 88324821  | ZNF469 | G | T | 0.662 | 0.125 | 0.983 | 0.182  | 0.030 | 2.07E-09 |
| rs28526212  | 16 | 88329202  | ZNF469 | A | G | 0.650 | 0.225 | 0.989 | 0.180  | 0.030 | 2.35E-09 |
| rs28698209  | 16 | 88324931  | ZNF469 | G | T | 0.661 | 0.132 | 0.980 | 0.180  | 0.030 | 3.50E-09 |
| rs28411862  | 16 | 88325560  | ZNF469 | C | G | 0.337 | 0.146 | 0.984 | -0.179 | 0.030 | 3.82E-09 |
| rs34715091  | 16 | 88326782  | ZNF469 | G | A | 0.352 | 0.197 | 0.985 | -0.177 | 0.030 | 4.01E-09 |
| rs11259972  | 16 | 88333296  | ZNF469 | C | T | 0.632 | 0.114 | 0.992 | 0.174  | 0.030 | 4.13E-09 |

|             |    |          |        |   |   |       |       |       |        |       |          |
|-------------|----|----------|--------|---|---|-------|-------|-------|--------|-------|----------|
| rs28563118  | 16 | 88327569 | ZNF469 | G | C | 0.349 | 0.177 | 0.987 | -0.177 | 0.030 | 4.28E-09 |
| rs8059298   | 16 | 88332479 | ZNF469 | C | T | 0.632 | 0.114 | 0.995 | 0.174  | 0.030 | 4.39E-09 |
| rs35479534  | 16 | 88324754 | ZNF469 | A | G | 0.663 | 0.138 | 0.985 | 0.178  | 0.030 | 4.44E-09 |
| rs28445880  | 16 | 88327422 | ZNF469 | T | G | 0.347 | 0.129 | 0.988 | -0.177 | 0.030 | 4.47E-09 |
| rs28425635  | 16 | 88323599 | ZNF469 | G | A | 0.340 | 0.140 | 0.985 | -0.177 | 0.030 | 5.70E-09 |
| rs9922572   | 16 | 88334112 | ZNF469 | C | A | 0.666 | 0.440 | 0.968 | 0.179  | 0.031 | 6.56E-09 |
| rs146769134 | 16 | 88323048 | ZNF469 | D | I | 0.338 | 0.132 | 0.985 | -0.176 | 0.030 | 6.64E-09 |
| rs28493272  | 16 | 88324245 | ZNF469 | T | C | 0.338 | 0.139 | 0.985 | -0.176 | 0.030 | 6.73E-09 |
| rs149051942 | 16 | 88322836 | ZNF469 | I | D | 0.338 | 0.118 | 0.985 | -0.176 | 0.030 | 6.93E-09 |
| rs28716598  | 16 | 88324563 | ZNF469 | G | C | 0.664 | 0.117 | 0.985 | 0.176  | 0.030 | 7.02E-09 |
| rs58577366  | 16 | 88323323 | ZNF469 | C | T | 0.337 | 0.111 | 0.985 | -0.175 | 0.030 | 8.04E-09 |
| rs9926214   | 16 | 88334441 | ZNF469 | T | C | 0.641 | 0.135 | 0.980 | 0.173  | 0.030 | 8.14E-09 |
| rs28715745  | 16 | 88324562 | ZNF469 | A | G | 0.660 | 0.085 | 0.982 | 0.175  | 0.030 | 8.78E-09 |
| rs12926024  | 16 | 88331309 | ZNF469 | C | T | 0.634 | 0.139 | 0.997 | 0.170  | 0.030 | 9.49E-09 |
| rs9934580   | 16 | 88331515 | ZNF469 | G | A | 0.634 | 0.153 | 0.997 | 0.169  | 0.030 | 1.23E-08 |
| rs9938149   | 16 | 88331640 | ZNF469 | A | C | 0.633 | 0.170 | 1.000 | 0.169  | 0.030 | 1.26E-08 |
| rs12719931  | 16 | 88335776 | ZNF469 | T | C | 0.650 | 0.205 | 0.982 | 0.172  | 0.030 | 1.35E-08 |
| rs12719930  | 16 | 88335774 | ZNF469 | A | G | 0.650 | 0.205 | 0.982 | 0.171  | 0.030 | 1.47E-08 |
| rs28481824  | 16 | 88326166 | ZNF469 | T | C | 0.332 | 0.092 | 0.985 | -0.172 | 0.030 | 1.69E-08 |
| rs141625840 | 16 | 88322876 | ZNF469 | I | D | 0.297 | 0.100 | 0.925 | -0.182 | 0.032 | 1.98E-08 |
| rs58664271  | 16 | 88322455 | ZNF469 | D | I | 0.340 | 0.101 | 0.980 | -0.170 | 0.030 | 2.25E-08 |
| rs12919641  | 16 | 88312600 | ZNF469 | C | G | 0.668 | 0.184 | 0.974 | 0.170  | 0.031 | 2.85E-08 |
| rs8057716   | 16 | 88335790 | ZNF469 | C | G | 0.667 | 0.334 | 0.982 | 0.170  | 0.031 | 2.95E-08 |
| rs58657775  | 16 | 88323829 | ZNF469 | G | A | 0.346 | 0.193 | 0.985 | -0.168 | 0.030 | 3.05E-08 |
| rs12935558  | 16 | 88336978 | ZNF469 | A | G | 0.641 | 0.150 | 0.981 | 0.166  | 0.030 | 3.18E-08 |
| rs12935576  | 16 | 88337013 | ZNF469 | A | G | 0.641 | 0.150 | 0.982 | 0.166  | 0.030 | 3.52E-08 |
| rs12918094  | 16 | 88337319 | ZNF469 | G | A | 0.641 | 0.150 | 0.981 | 0.166  | 0.030 | 3.55E-08 |
| rs7501109   | 16 | 88320862 | ZNF469 | C | G | 0.655 | 0.135 | 0.989 | 0.166  | 0.030 | 4.01E-08 |

|             |    |          |               |   |   |       |       |       |        |       |          |
|-------------|----|----------|---------------|---|---|-------|-------|-------|--------|-------|----------|
| rs6540217   | 16 | 88310910 | <i>ZNF469</i> | G | A | 0.658 | 0.127 | 0.984 | 0.166  | 0.030 | 4.04E-08 |
| rs7403826   | 16 | 88321167 | <i>ZNF469</i> | T | A | 0.656 | 0.150 | 0.988 | 0.165  | 0.030 | 4.85E-08 |
| rs7404292   | 16 | 88338467 | <i>ZNF469</i> | G | A | 0.667 | 0.407 | 0.980 | 0.168  | 0.031 | 4.88E-08 |
| rs149540885 | 18 | 52877255 | <i>TCF4</i>   | C | T | 0.027 | 0.243 | 0.964 | -0.512 | 0.091 | 1.79E-08 |
| rs11659764  | 18 | 53335512 | <i>TCF4</i>   | A | T | 0.056 | 1.000 | 0.990 | -0.349 | 0.063 | 2.55E-08 |
| rs182804464 | 21 | 47420667 | <i>COL6A1</i> | G | C | 0.016 | 0.678 | 0.978 | -0.694 | 0.117 | 2.83E-09 |
| rs142493024 | 21 | 47413793 | <i>COL6A1</i> | A | G | 0.016 | 0.680 | 0.968 | -0.681 | 0.117 | 6.45E-09 |
| rs148766287 | 21 | 47404422 | <i>COL6A1</i> | G | C | 0.016 | 0.684 | 0.959 | -0.661 | 0.117 | 1.78E-08 |

**eTable 3.** Genome-wide Significant SNPs From Meta-analysis of Corneal Hysteresis GWAS in EPIC-Norfolk and TwinsUK

Alternate shading is used to highlight different loci, and the nearest gene at each locus is presented.

| rs ID       | Chromosome | Position  | Nearest gene to locus | Allele 1 | Allele 2 | Beta   | Standard error | P-value  | Direction | I-squared |
|-------------|------------|-----------|-----------------------|----------|----------|--------|----------------|----------|-----------|-----------|
| rs78658973  | 2          | 112484525 | <i>ANAPC1</i>         | a        | t        | 0.207  | 0.028          | 1.79E-13 | ++        | 0         |
| rs142498660 | 2          | 112484861 | <i>ANAPC1</i>         | t        | c        | 0.207  | 0.028          | 1.78E-13 | ++        | 0         |
| rs114204453 | 2          | 112486894 | <i>ANAPC1</i>         | a        | g        | 0.206  | 0.028          | 2.20E-13 | ++        | 0         |
| rs12612620  | 2          | 112488876 | <i>ANAPC1</i>         | a        | g        | 0.206  | 0.028          | 2.20E-13 | ++        | 0         |
| rs371809230 | 2          | 112489416 | <i>ANAPC1</i>         | a        | g        | 0.206  | 0.028          | 2.26E-13 | ++        | 0         |
| rs201205018 | 2          | 112490128 | <i>ANAPC1</i>         | a        | g        | 0.206  | 0.028          | 2.41E-13 | ++        | 0         |
| rs72823439  | 2          | 112490328 | <i>ANAPC1</i>         | t        | g        | -0.205 | 0.028          | 3.33E-13 | --        | 0         |
| rs77403931  | 2          | 112490371 | <i>ANAPC1</i>         | c        | g        | -0.206 | 0.028          | 2.07E-13 | --        | 0         |
| rs72823440  | 2          | 112490418 | <i>ANAPC1</i>         | a        | g        | 0.206  | 0.028          | 2.39E-13 | ++        | 0         |
| rs71252597  | 2          | 112492986 | <i>ANAPC1</i>         | t        | c        | -0.206 | 0.030          | 3.01E-12 | --        | 0         |
| rs143231698 | 2          | 112493732 | <i>ANAPC1</i>         | a        | g        | -0.204 | 0.030          | 4.39E-12 | --        | 0         |
| rs145274367 | 2          | 112494600 | <i>ANAPC1</i>         | a        | c        | 0.204  | 0.028          | 2.71E-13 | ++        | 0         |
| rs149542794 | 2          | 112496121 | <i>ANAPC1</i>         | a        | t        | 0.204  | 0.028          | 2.83E-13 | ++        | 0         |
| rs200632716 | 2          | 112496958 | <i>ANAPC1</i>         | a        | c        | 0.203  | 0.028          | 3.12E-13 | ++        | 0         |
| rs74267315  | 2          | 112498114 | <i>ANAPC1</i>         | a        | g        | -0.204 | 0.028          | 2.66E-13 | --        | 0         |
| rs17040773  | 2          | 112500035 | <i>ANAPC1</i>         | a        | c        | -0.199 | 0.027          | 4.68E-13 | --        | 0         |
| rs71226248  | 2          | 112506511 | <i>ANAPC1</i>         | t        | c        | 0.200  | 0.027          | 3.41E-13 | ++        | 0         |
| rs150306256 | 2          | 112506733 | <i>ANAPC1</i>         | t        | c        | -0.199 | 0.027          | 4.65E-13 | --        | 0         |
| 2:112520793 | 2          | 112520793 | <i>ANAPC1</i>         | a        | g        | -0.199 | 0.027          | 2.28E-13 | --        | 0         |
| rs114755846 | 2          | 112520920 | <i>ANAPC1</i>         | a        | t        | -0.199 | 0.027          | 2.43E-13 | --        | 0         |
| rs2948006   | 2          | 112521945 | <i>ANAPC1</i>         | a        | g        | 0.198  | 0.027          | 5.52E-13 | ++        | 0         |
| rs137999262 | 2          | 112526866 | <i>ANAPC1</i>         | a        | g        | 0.199  | 0.027          | 3.29E-13 | ++        | 0         |



|             |   |           |        |   |   |        |       |          |    |   |
|-------------|---|-----------|--------|---|---|--------|-------|----------|----|---|
| rs147346361 | 2 | 112529050 | ANAPC1 | a | g | -0.199 | 0.027 | 3.24E-13 | -- | 0 |
| rs79671094  | 2 | 112531691 | ANAPC1 | a | g | 0.203  | 0.028 | 2.65E-13 | ++ | 0 |
| rs76210128  | 2 | 112532987 | ANAPC1 | t | c | 0.199  | 0.027 | 3.20E-13 | ++ | 0 |
| rs200193771 | 2 | 112538247 | ANAPC1 | a | g | 0.190  | 0.027 | 1.36E-12 | ++ | 0 |
| rs77797441  | 2 | 112539384 | ANAPC1 | t | c | 0.203  | 0.028 | 5.06E-13 | ++ | 0 |
| rs78676279  | 2 | 112543377 | ANAPC1 | t | c | 0.191  | 0.027 | 1.35E-12 | ++ | 0 |
| rs80125903  | 2 | 112549693 | ANAPC1 | a | c | 0.191  | 0.027 | 1.36E-12 | ++ | 0 |
| rs202110867 | 2 | 112550325 | ANAPC1 | c | g | -0.207 | 0.027 | 4.43E-14 | -- | 0 |
| rs189319935 | 2 | 112550621 | ANAPC1 | a | g | -0.202 | 0.028 | 1.33E-12 | -- | 0 |
| rs190739040 | 2 | 112552427 | ANAPC1 | t | c | 0.199  | 0.027 | 4.86E-13 | ++ | 0 |
| rs192541479 | 2 | 112552967 | ANAPC1 | a | t | -0.199 | 0.027 | 5.24E-13 | -- | 0 |
| rs200623464 | 2 | 112554527 | ANAPC1 | t | g | 0.198  | 0.027 | 4.56E-13 | ++ | 0 |
| rs141660957 | 2 | 112554577 | ANAPC1 | t | c | 0.198  | 0.027 | 4.46E-13 | ++ | 0 |
| rs200015423 | 2 | 112558479 | ANAPC1 | a | g | -0.200 | 0.027 | 2.70E-13 | -- | 0 |
| rs201175214 | 2 | 112559582 | ANAPC1 | a | g | -0.194 | 0.027 | 6.22E-13 | -- | 0 |
| rs142711068 | 2 | 112560090 | ANAPC1 | a | g | 0.193  | 0.027 | 7.06E-13 | ++ | 0 |
| rs202074374 | 2 | 112564426 | ANAPC1 | a | c | -0.192 | 0.027 | 9.14E-13 | -- | 0 |
| rs201128688 | 2 | 112566517 | ANAPC1 | t | c | 0.191  | 0.027 | 1.20E-12 | ++ | 0 |
| rs201709611 | 2 | 112567624 | ANAPC1 | c | g | -0.190 | 0.027 | 1.66E-12 | -- | 0 |
| rs113870763 | 2 | 112567980 | ANAPC1 | t | c | -0.190 | 0.027 | 1.62E-12 | -- | 0 |
| rs187091502 | 2 | 112577962 | ANAPC1 | t | c | 0.202  | 0.028 | 3.37E-13 | ++ | 0 |
| rs201745139 | 2 | 112578794 | ANAPC1 | t | c | -0.196 | 0.027 | 8.65E-13 | -- | 0 |
| rs66739581  | 2 | 112580971 | ANAPC1 | t | c | -0.192 | 0.027 | 6.14E-13 | -- | 0 |
| rs150954153 | 2 | 112581910 | ANAPC1 | a | g | -0.195 | 0.027 | 1.09E-12 | -- | 0 |
| rs12614297  | 2 | 112583476 | ANAPC1 | t | c | 0.195  | 0.027 | 9.38E-13 | ++ | 0 |
| rs56307072  | 2 | 112584242 | ANAPC1 | a | t | -0.177 | 0.027 | 8.59E-11 | -- | 0 |
| rs11122983  | 2 | 112584291 | ANAPC1 | a | g | 0.196  | 0.027 | 7.56E-13 | ++ | 0 |
| rs7580454   | 2 | 112587099 | ANAPC1 | t | c | 0.184  | 0.025 | 6.31E-13 | ++ | 0 |

|             |    |           |         |   |   |        |       |          |    |   |
|-------------|----|-----------|---------|---|---|--------|-------|----------|----|---|
| rs11675449  | 2  | 112589080 | ANAPC1  | a | g | 0.194  | 0.027 | 1.14E-12 | ++ | 0 |
| rs11674974  | 2  | 112591840 | ANAPC1  | a | g | -0.194 | 0.027 | 1.20E-12 | -- | 0 |
| rs35212506  | 2  | 112594570 | ANAPC1  | c | g | -0.194 | 0.027 | 1.48E-12 | -- | 0 |
| rs11683345  | 2  | 112597057 | ANAPC1  | t | c | 0.194  | 0.027 | 1.36E-12 | ++ | 0 |
| rs12617909  | 2  | 112598119 | ANAPC1  | t | c | 0.193  | 0.027 | 1.72E-12 | ++ | 0 |
| rs12992603  | 2  | 112598534 | ANAPC1  | c | g | -0.191 | 0.027 | 1.22E-12 | -- | 0 |
| rs11122990  | 2  | 112599436 | ANAPC1  | t | c | 0.194  | 0.027 | 1.17E-12 | ++ | 0 |
| rs11674795  | 2  | 112602249 | ANAPC1  | a | t | -0.192 | 0.027 | 1.96E-12 | -- | 0 |
| rs10779879  | 2  | 112603408 | ANAPC1  | t | c | 0.193  | 0.027 | 1.52E-12 | ++ | 0 |
| rs74182847  | 2  | 112604183 | ANAPC1  | a | g | -0.193 | 0.027 | 1.68E-12 | -- | 0 |
| rs71413401  | 2  | 112604685 | ANAPC1  | t | c | -0.193 | 0.027 | 1.63E-12 | -- | 0 |
| rs74189873  | 2  | 112606330 | ANAPC1  | a | g | 0.194  | 0.027 | 1.24E-12 | ++ | 0 |
| rs3877249   | 2  | 112615253 | ANAPC1  | t | c | 0.194  | 0.027 | 1.42E-12 | ++ | 0 |
| rs76292584  | 2  | 112619067 | ANAPC1  | a | g | 0.193  | 0.027 | 1.46E-12 | ++ | 0 |
| rs11689168  | 2  | 112621199 | ANAPC1  | t | c | -0.193 | 0.027 | 1.55E-12 | -- | 0 |
| rs34432308  | 2  | 112626193 | ANAPC1  | t | c | 0.191  | 0.027 | 2.33E-12 | ++ | 0 |
| rs35366113  | 2  | 112629488 | ANAPC1  | a | t | 0.191  | 0.027 | 2.55E-12 | ++ | 0 |
| rs80233695  | 2  | 112633047 | ANAPC1  | t | c | -0.192 | 0.027 | 1.82E-12 | -- | 0 |
| rs113894504 | 2  | 112633092 | ANAPC1  | c | g | -0.191 | 0.027 | 2.50E-12 | -- | 0 |
| rs1548189   | 2  | 112633562 | ANAPC1  | t | g | 0.186  | 0.027 | 3.37E-12 | ++ | 0 |
| rs13000524  | 2  | 112637867 | ANAPC1  | t | g | -0.193 | 0.027 | 1.56E-12 | -- | 0 |
| rs71414609  | 2  | 112640229 | ANAPC1  | a | g | 0.185  | 0.027 | 4.50E-12 | ++ | 0 |
| rs35533505  | 2  | 112640543 | ANAPC1  | c | g | 0.185  | 0.027 | 4.87E-12 | ++ | 0 |
| rs17835589  | 2  | 112641149 | ANAPC1  | c | g | 0.182  | 0.026 | 5.05E-12 | ++ | 0 |
| rs71414610  | 2  | 112641266 | ANAPC1  | c | g | 0.185  | 0.027 | 4.34E-12 | ++ | 0 |
| rs56009602  | 11 | 130419717 | ADAMTS8 | t | c | 0.344  | 0.059 | 4.29E-09 | ++ | 0 |
| rs2721043   | 13 | 41078668  | FOXO1   | a | c | -0.216 | 0.039 | 3.62E-08 | -- | 0 |
| rs2755238   | 13 | 41110270  | FOXO1   | t | c | 0.245  | 0.037 | 6.33E-11 | ++ | 0 |

|            |    |          |               |   |   |        |       |          |    |    |
|------------|----|----------|---------------|---|---|--------|-------|----------|----|----|
| rs2721051  | 13 | 41110884 | <i>FOXO1</i>  | t | c | -0.246 | 0.037 | 4.48E-11 | -- | 0  |
| rs74948688 | 13 | 41110922 | <i>FOXO1</i>  | t | c | -0.264 | 0.046 | 1.11E-08 | -- | 0  |
| rs79728429 | 13 | 41114572 | <i>FOXO1</i>  | t | c | -0.281 | 0.048 | 4.75E-09 | -- | 0  |
| rs2701857  | 13 | 41115586 | <i>FOXO1</i>  | a | c | 0.246  | 0.038 | 5.63E-11 | ++ | 0  |
| rs11616662 | 13 | 41119466 | <i>FOXO1</i>  | a | g | -0.245 | 0.038 | 6.69E-11 | -- | 0  |
| rs28378192 | 16 | 88329659 | <i>ZNF469</i> | t | c | 0.137  | 0.025 | 2.52E-08 | ++ | 0  |
| rs12448211 | 16 | 88330512 | <i>ZNF469</i> | a | g | 0.138  | 0.025 | 1.73E-08 | ++ | 0  |
| rs77542162 | 17 | 67081278 | <i>ABCA6</i>  | a | g | -0.538 | 0.082 | 6.56E-11 | -- | 71 |

**eTable 4.** Genome-wide Significant SNPs From Meta-analysis of Corneal Resistance Factor GWAS in EPIC-Norfolk and TwinsUK

Alternate shading is used to highlight different loci, and the nearest gene at each locus is presented.

| rs ID       | Chromosome | Position  | Nearest gene to locus | Allele1 | Allele2 | Beta   | Standard error | P-value | Direction | I-squared |
|-------------|------------|-----------|-----------------------|---------|---------|--------|----------------|---------|-----------|-----------|
| rs78658973  | 2          | 112484525 | <i>ANAPC1</i>         | a       | t       | 0.202  | 0.031          | 3.8E-11 | ++        | 0         |
| rs142498660 | 2          | 112484861 | <i>ANAPC1</i>         | t       | c       | 0.203  | 0.031          | 3.7E-11 | ++        | 0         |
| rs114204453 | 2          | 112486894 | <i>ANAPC1</i>         | a       | g       | 0.201  | 0.031          | 5.7E-11 | ++        | 0         |
| rs12612620  | 2          | 112488876 | <i>ANAPC1</i>         | a       | g       | 0.202  | 0.031          | 4.0E-11 | ++        | 0         |
| rs371809230 | 2          | 112489416 | <i>ANAPC1</i>         | a       | g       | 0.202  | 0.031          | 4.1E-11 | ++        | 0         |
| rs201205018 | 2          | 112490128 | <i>ANAPC1</i>         | a       | g       | 0.201  | 0.031          | 5.5E-11 | ++        | 0         |
| rs72823439  | 2          | 112490328 | <i>ANAPC1</i>         | t       | g       | -0.200 | 0.031          | 7.3E-11 | --        | 0         |
| rs77403931  | 2          | 112490371 | <i>ANAPC1</i>         | c       | g       | -0.204 | 0.031          | 2.8E-11 | --        | 0         |
| rs72823440  | 2          | 112490418 | <i>ANAPC1</i>         | a       | g       | 0.202  | 0.031          | 4.3E-11 | ++        | 0         |
| rs71252597  | 2          | 112492986 | <i>ANAPC1</i>         | t       | c       | -0.211 | 0.032          | 5.6E-11 | --        | 0         |
| rs143231698 | 2          | 112493732 | <i>ANAPC1</i>         | a       | g       | -0.210 | 0.032          | 6.5E-11 | --        | 0         |
| rs145274367 | 2          | 112494600 | <i>ANAPC1</i>         | a       | c       | 0.201  | 0.031          | 4.8E-11 | ++        | 0         |
| rs149542794 | 2          | 112496121 | <i>ANAPC1</i>         | a       | t       | 0.200  | 0.030          | 4.9E-11 | ++        | 0         |
| rs200632716 | 2          | 112496958 | <i>ANAPC1</i>         | a       | c       | 0.199  | 0.030          | 5.4E-11 | ++        | 0         |
| rs74267315  | 2          | 112498114 | <i>ANAPC1</i>         | a       | g       | -0.201 | 0.030          | 4.1E-11 | --        | 0         |
| rs17040773  | 2          | 112500035 | <i>ANAPC1</i>         | a       | c       | -0.199 | 0.030          | 3.3E-11 | --        | 0         |
| rs71226248  | 2          | 112506511 | <i>ANAPC1</i>         | t       | c       | 0.199  | 0.030          | 3.1E-11 | ++        | 0         |
| rs150306256 | 2          | 112506733 | <i>ANAPC1</i>         | t       | c       | -0.199 | 0.030          | 3.5E-11 | --        | 0         |
| 2:112520793 | 2          | 112520793 | <i>ANAPC1</i>         | a       | g       | -0.200 | 0.030          | 1.4E-11 | --        | 0         |
| rs114755846 | 2          | 112520920 | <i>ANAPC1</i>         | a       | t       | -0.199 | 0.030          | 1.9E-11 | --        | 0         |
| rs2948006   | 2          | 112521945 | <i>ANAPC1</i>         | a       | g       | 0.197  | 0.030          | 3.8E-11 | ++        | 0         |
| rs137999262 | 2          | 112526866 | <i>ANAPC1</i>         | a       | g       | 0.199  | 0.030          | 2.8E-11 | ++        | 0         |
| rs147346361 | 2          | 112529050 | <i>ANAPC1</i>         | a       | g       | -0.199 | 0.030          | 2.6E-11 | --        | 0         |

|             |   |           |        |   |   |        |       |         |    |   |
|-------------|---|-----------|--------|---|---|--------|-------|---------|----|---|
| rs79671094  | 2 | 112531691 | ANAPC1 | a | g | 0.200  | 0.030 | 3.5E-11 | ++ | 0 |
| rs76210128  | 2 | 112532987 | ANAPC1 | t | c | 0.199  | 0.030 | 2.9E-11 | ++ | 0 |
| rs200193771 | 2 | 112538247 | ANAPC1 | a | g | 0.190  | 0.029 | 9.3E-11 | ++ | 0 |
| rs77797441  | 2 | 112539384 | ANAPC1 | t | c | 0.209  | 0.031 | 8.0E-12 | ++ | 0 |
| rs78676279  | 2 | 112543377 | ANAPC1 | t | c | 0.190  | 0.029 | 9.1E-11 | ++ | 0 |
| rs80125903  | 2 | 112549693 | ANAPC1 | a | c | 0.190  | 0.029 | 9.7E-11 | ++ | 0 |
| rs202110867 | 2 | 112550325 | ANAPC1 | c | g | -0.204 | 0.030 | 1.0E-11 | -- | 0 |
| rs189319935 | 2 | 112550621 | ANAPC1 | a | g | -0.204 | 0.031 | 5.2E-11 | -- | 0 |
| rs190739040 | 2 | 112552427 | ANAPC1 | t | c | 0.197  | 0.030 | 4.6E-11 | ++ | 0 |
| rs192541479 | 2 | 112552967 | ANAPC1 | a | t | -0.198 | 0.030 | 4.5E-11 | -- | 0 |
| rs200623464 | 2 | 112554527 | ANAPC1 | t | g | 0.198  | 0.030 | 3.6E-11 | ++ | 0 |
| rs141660957 | 2 | 112554577 | ANAPC1 | t | c | 0.198  | 0.030 | 3.2E-11 | ++ | 0 |
| rs200015423 | 2 | 112558479 | ANAPC1 | a | g | -0.199 | 0.030 | 2.6E-11 | -- | 0 |
| rs201175214 | 2 | 112559582 | ANAPC1 | a | g | -0.191 | 0.029 | 7.3E-11 | -- | 0 |
| rs142711068 | 2 | 112560090 | ANAPC1 | a | g | 0.191  | 0.029 | 8.9E-11 | ++ | 0 |
| rs202074374 | 2 | 112564426 | ANAPC1 | a | c | -0.190 | 0.029 | 1.0E-10 | -- | 0 |
| rs201128688 | 2 | 112566517 | ANAPC1 | t | c | 0.187  | 0.029 | 1.9E-10 | ++ | 0 |
| rs201709611 | 2 | 112567624 | ANAPC1 | c | g | -0.186 | 0.029 | 2.0E-10 | -- | 0 |
| rs113870763 | 2 | 112567980 | ANAPC1 | t | c | -0.187 | 0.029 | 2.0E-10 | -- | 0 |
| rs187091502 | 2 | 112577962 | ANAPC1 | t | c | 0.200  | 0.030 | 3.7E-11 | ++ | 0 |
| rs201745139 | 2 | 112578794 | ANAPC1 | t | c | -0.193 | 0.030 | 1.0E-10 | -- | 0 |
| rs66739581  | 2 | 112580971 | ANAPC1 | t | c | -0.189 | 0.029 | 9.4E-11 | -- | 0 |
| rs150954153 | 2 | 112581910 | ANAPC1 | a | g | -0.192 | 0.030 | 1.3E-10 | -- | 0 |
| rs12614297  | 2 | 112583476 | ANAPC1 | t | c | 0.192  | 0.030 | 1.2E-10 | ++ | 0 |
| rs56307072  | 2 | 112584242 | ANAPC1 | a | t | -0.197 | 0.030 | 3.3E-11 | -- | 0 |
| rs11122983  | 2 | 112584291 | ANAPC1 | a | g | 0.193  | 0.030 | 8.9E-11 | ++ | 0 |
| rs7580454   | 2 | 112587099 | ANAPC1 | t | c | 0.189  | 0.028 | 1.1E-11 | ++ | 0 |
| rs11675449  | 2 | 112589080 | ANAPC1 | a | g | 0.192  | 0.030 | 1.3E-10 | ++ | 0 |

|             |   |           |        |   |   |        |       |          |    |   |
|-------------|---|-----------|--------|---|---|--------|-------|----------|----|---|
| rs11674974  | 2 | 112591840 | ANAPC1 | a | g | -0.191 | 0.030 | 1.3E-10  | -- | 0 |
| rs35212506  | 2 | 112594570 | ANAPC1 | c | g | -0.191 | 0.030 | 1.7E-10  | -- | 0 |
| rs11683345  | 2 | 112597057 | ANAPC1 | t | c | 0.191  | 0.030 | 1.5E-10  | ++ | 0 |
| rs12617909  | 2 | 112598119 | ANAPC1 | t | c | 0.190  | 0.030 | 1.8E-10  | ++ | 0 |
| rs12992603  | 2 | 112598534 | ANAPC1 | c | g | -0.187 | 0.029 | 1.8E-10  | -- | 0 |
| rs11122990  | 2 | 112599436 | ANAPC1 | t | c | 0.192  | 0.030 | 1.3E-10  | ++ | 0 |
| rs11674795  | 2 | 112602249 | ANAPC1 | a | t | -0.191 | 0.030 | 1.6E-10  | -- | 0 |
| rs10779879  | 2 | 112603408 | ANAPC1 | t | c | 0.191  | 0.030 | 1.5E-10  | ++ | 0 |
| rs74182847  | 2 | 112604183 | ANAPC1 | a | g | -0.191 | 0.030 | 1.5E-10  | -- | 0 |
| rs71413401  | 2 | 112604685 | ANAPC1 | t | c | -0.190 | 0.030 | 1.8E-10  | -- | 0 |
| rs74189873  | 2 | 112606330 | ANAPC1 | a | g | 0.192  | 0.030 | 1.2E-10  | ++ | 0 |
| rs3877249   | 2 | 112615253 | ANAPC1 | t | c | 0.192  | 0.030 | 1.2E-10  | ++ | 0 |
| rs76292584  | 2 | 112619067 | ANAPC1 | a | g | 0.191  | 0.030 | 1.3E-10  | ++ | 0 |
| rs11689168  | 2 | 112621199 | ANAPC1 | t | c | -0.191 | 0.030 | 1.3E-10  | -- | 0 |
| rs34432308  | 2 | 112626193 | ANAPC1 | t | c | 0.189  | 0.030 | 2.2E-10  | ++ | 0 |
| rs35366113  | 2 | 112629488 | ANAPC1 | a | t | 0.189  | 0.030 | 2.2E-10  | ++ | 0 |
| rs80233695  | 2 | 112633047 | ANAPC1 | t | c | -0.190 | 0.030 | 1.4E-10  | -- | 0 |
| rs113894504 | 2 | 112633092 | ANAPC1 | c | g | -0.189 | 0.030 | 2.3E-10  | -- | 0 |
| rs1548189   | 2 | 112633562 | ANAPC1 | t | g | 0.183  | 0.029 | 3.5E-10  | ++ | 0 |
| rs13000524  | 2 | 112637867 | ANAPC1 | t | g | -0.191 | 0.030 | 1.4E-10  | -- | 0 |
| rs71414609  | 2 | 112640229 | ANAPC1 | a | g | 0.178  | 0.029 | 1.0E-09  | ++ | 0 |
| rs35533505  | 2 | 112640543 | ANAPC1 | c | g | 0.177  | 0.029 | 1.2E-09  | ++ | 0 |
| rs17835589  | 2 | 112641149 | ANAPC1 | c | g | 0.174  | 0.029 | 1.5E-09  | ++ | 0 |
| rs71414610  | 2 | 112641266 | ANAPC1 | c | g | 0.178  | 0.029 | 1.1E-09  | ++ | 0 |
| rs6445054   | 3 | 172274219 | FNDC3B | t | c | 0.194  | 0.034 | 1.38E-08 | ++ | 0 |
| rs6445055   | 3 | 172274597 | FNDC3B | a | g | -0.193 | 0.034 | 1.68E-08 | -- | 0 |
| rs6800129   | 3 | 172278729 | FNDC3B | c | g | 0.191  | 0.034 | 1.86E-08 | ++ | 0 |
| rs4894414   | 3 | 172279709 | FNDC3B | t | c | -0.191 | 0.034 | 2.08E-08 | -- | 0 |

|             |    |           |          |   |   |        |       |          |    |   |
|-------------|----|-----------|----------|---|---|--------|-------|----------|----|---|
| rs56009602  | 11 | 130419717 | ADAMTS8  | t | c | 0.376  | 0.064 | 3.34E-09 | ++ | 0 |
| rs2721043   | 13 | 41078668  | FOXO1    | a | c | -0.235 | 0.043 | 4.3E-08  | -- | 0 |
| rs2755238   | 13 | 41110270  | FOXO1    | t | c | 0.267  | 0.041 | 6.2E-11  | ++ | 0 |
| rs2721051   | 13 | 41110884  | FOXO1    | t | c | -0.268 | 0.041 | 5.2E-11  | -- | 0 |
| rs74948688  | 13 | 41110922  | FOXO1    | t | c | -0.302 | 0.050 | 2.0E-09  | -- | 0 |
| rs79728429  | 13 | 41114572  | FOXO1    | t | c | -0.306 | 0.052 | 4.8E-09  | -- | 0 |
| rs2701857   | 13 | 41115586  | FOXO1    | a | c | 0.266  | 0.041 | 8.6E-11  | ++ | 0 |
| rs11616662  | 13 | 41119466  | FOXO1    | a | g | -0.265 | 0.041 | 1.1E-10  | -- | 0 |
| rs72755233  | 15 | 100152748 | ADAMTS17 | a | g | 0.233  | 0.043 | 4.48E-08 | ++ | 0 |
| rs7185012   | 16 | 88293631  | ZNF469   | a | t | 0.159  | 0.028 | 1.3E-08  | ++ | 0 |
| rs12447690  | 16 | 88298124  | ZNF469   | t | c | 0.160  | 0.026 | 1.1E-09  | ++ | 0 |
| rs7201034   | 16 | 88298705  | ZNF469   | a | g | -0.166 | 0.027 | 5.9E-10  | -- | 0 |
| rs7500824   | 16 | 88299491  | ZNF469   | a | g | -0.161 | 0.026 | 1.2E-09  | -- | 0 |
| rs35542380  | 16 | 88299593  | ZNF469   | c | g | 0.162  | 0.027 | 1.3E-09  | ++ | 0 |
| rs7498219   | 16 | 88300110  | ZNF469   | t | c | 0.157  | 0.026 | 2.6E-09  | ++ | 0 |
| rs6540214   | 16 | 88301976  | ZNF469   | a | g | 0.161  | 0.027 | 1.9E-09  | ++ | 0 |
| rs7405095   | 16 | 88307825  | ZNF469   | a | g | -0.163 | 0.027 | 1.8E-09  | -- | 0 |
| rs6540217   | 16 | 88310910  | ZNF469   | a | g | -0.167 | 0.027 | 7.8E-10  | -- | 0 |
| rs200073183 | 16 | 88311533  | ZNF469   | t | c | -0.160 | 0.027 | 6.4E-09  | -- | 0 |
| rs12919641  | 16 | 88312600  | ZNF469   | c | g | 0.171  | 0.027 | 5.0E-10  | ++ | 0 |
| rs12925350  | 16 | 88312692  | ZNF469   | t | c | -0.167 | 0.027 | 7.8E-10  | -- | 0 |
| rs71372762  | 16 | 88313227  | ZNF469   | t | c | 0.157  | 0.027 | 7.6E-09  | ++ | 0 |
| rs62047083  | 16 | 88313255  | ZNF469   | a | g | -0.159 | 0.027 | 4.1E-09  | -- | 0 |
| rs8059024   | 16 | 88314163  | ZNF469   | t | c | -0.161 | 0.027 | 2.3E-09  | -- | 0 |
| rs11117401  | 16 | 88314452  | ZNF469   | a | g | 0.163  | 0.027 | 1.3E-09  | ++ | 0 |
| rs6540220   | 16 | 88315515  | ZNF469   | c | g | 0.160  | 0.027 | 2.7E-09  | ++ | 0 |
| rs7198116   | 16 | 88318648  | ZNF469   | t | c | -0.160 | 0.027 | 2.6E-09  | -- | 0 |
| rs12711488  | 16 | 88319421  | ZNF469   | c | g | -0.159 | 0.027 | 3.3E-09  | -- | 0 |

|            |    |          |        |   |   |        |       |         |    |   |
|------------|----|----------|--------|---|---|--------|-------|---------|----|---|
| rs7498700  | 16 | 88320620 | ZNF469 | t | c | -0.161 | 0.027 | 2.0E-09 | -- | 0 |
| rs7501109  | 16 | 88320862 | ZNF469 | c | g | 0.163  | 0.027 | 1.3E-09 | ++ | 0 |
| rs7501402  | 16 | 88320911 | ZNF469 | a | t | -0.163 | 0.027 | 1.2E-09 | -- | 0 |
| rs7403826  | 16 | 88321167 | ZNF469 | a | t | -0.163 | 0.027 | 1.2E-09 | -- | 0 |
| rs6540223  | 16 | 88321436 | ZNF469 | t | c | 0.160  | 0.027 | 2.5E-09 | ++ | 0 |
| rs58577366 | 16 | 88323323 | ZNF469 | t | c | 0.169  | 0.027 | 3.8E-10 | ++ | 0 |
| rs28425635 | 16 | 88323599 | ZNF469 | a | g | 0.173  | 0.027 | 1.3E-10 | ++ | 0 |
| rs58657775 | 16 | 88323829 | ZNF469 | a | g | 0.165  | 0.027 | 8.3E-10 | ++ | 0 |
| rs28493272 | 16 | 88324245 | ZNF469 | t | c | -0.171 | 0.027 | 1.9E-10 | -- | 0 |
| rs28715745 | 16 | 88324562 | ZNF469 | a | g | 0.168  | 0.027 | 4.1E-10 | ++ | 0 |
| rs28716598 | 16 | 88324563 | ZNF469 | c | g | -0.169 | 0.027 | 3.3E-10 | -- | 0 |
| rs35479534 | 16 | 88324754 | ZNF469 | a | g | 0.173  | 0.027 | 1.3E-10 | ++ | 0 |
| rs35193497 | 16 | 88324821 | ZNF469 | t | g | -0.176 | 0.027 | 6.2E-11 | -- | 0 |
| rs28698209 | 16 | 88324931 | ZNF469 | t | g | -0.174 | 0.027 | 9.1E-11 | -- | 0 |
| rs28411862 | 16 | 88325560 | ZNF469 | c | g | -0.174 | 0.027 | 1.1E-10 | -- | 0 |
| rs28481824 | 16 | 88326166 | ZNF469 | t | c | -0.166 | 0.027 | 7.4E-10 | -- | 0 |
| rs34715091 | 16 | 88326782 | ZNF469 | a | g | 0.170  | 0.027 | 1.4E-10 | ++ | 0 |
| rs28445880 | 16 | 88327422 | ZNF469 | t | g | -0.167 | 0.027 | 2.9E-10 | -- | 0 |
| rs28563118 | 16 | 88327569 | ZNF469 | c | g | 0.169  | 0.027 | 1.8E-10 | ++ | 0 |
| rs28687756 | 16 | 88328928 | ZNF469 | t | g | -0.178 | 0.027 | 4.1E-11 | -- | 0 |
| rs28526212 | 16 | 88329202 | ZNF469 | a | g | 0.170  | 0.026 | 1.2E-10 | ++ | 0 |
| rs28378192 | 16 | 88329660 | ZNF469 | t | c | 0.170  | 0.026 | 5.5E-11 | ++ | 0 |
| rs12719932 | 16 | 88330349 | ZNF469 | a | g | -0.171 | 0.026 | 5.0E-11 | -- | 0 |
| rs12448211 | 16 | 88330513 | ZNF469 | a | g | 0.170  | 0.026 | 5.1E-11 | ++ | 0 |
| rs12926024 | 16 | 88331309 | ZNF469 | t | c | -0.158 | 0.026 | 7.6E-10 | -- | 0 |
| rs9934580  | 16 | 88331515 | ZNF469 | a | g | -0.157 | 0.026 | 1.0E-09 | -- | 0 |
| rs9938149  | 16 | 88331640 | ZNF469 | a | c | 0.156  | 0.026 | 1.1E-09 | ++ | 0 |
| rs8059298  | 16 | 88332479 | ZNF469 | t | c | -0.161 | 0.026 | 3.9E-10 | -- | 0 |



|             |    |          |        |   |   |        |       |         |    |    |
|-------------|----|----------|--------|---|---|--------|-------|---------|----|----|
| rs11259972  | 16 | 88333296 | ZNF469 | t | c | -0.162 | 0.026 | 3.6E-10 | -- | 0  |
| rs9922572   | 16 | 88334112 | ZNF469 | a | c | -0.170 | 0.027 | 2.9E-10 | -- | 0  |
| rs9926214   | 16 | 88334441 | ZNF469 | t | c | 0.161  | 0.026 | 7.7E-10 | ++ | 0  |
| rs12719930  | 16 | 88335774 | ZNF469 | a | g | 0.162  | 0.026 | 7.8E-10 | ++ | 0  |
| rs12719931  | 16 | 88335776 | ZNF469 | t | c | 0.162  | 0.026 | 7.4E-10 | ++ | 0  |
| rs8057716   | 16 | 88335790 | ZNF469 | c | g | 0.157  | 0.027 | 3.8E-09 | ++ | 0  |
| rs12935558  | 16 | 88336978 | ZNF469 | a | g | 0.157  | 0.026 | 1.8E-09 | ++ | 0  |
| rs12935576  | 16 | 88337013 | ZNF469 | a | g | 0.155  | 0.026 | 2.4E-09 | ++ | 0  |
| rs12918094  | 16 | 88337319 | ZNF469 | a | g | -0.155 | 0.026 | 2.4E-09 | -- | 0  |
| rs9925231   | 16 | 88338107 | ZNF469 | t | c | -0.153 | 0.026 | 4.5E-09 | -- | 0  |
| rs7404292   | 16 | 88338467 | ZNF469 | a | g | -0.156 | 0.027 | 5.1E-09 | -- | 0  |
| rs6603048   | 16 | 88340921 | ZNF469 | t | c | -0.157 | 0.027 | 5.9E-09 | -- | 0  |
| rs7199889   | 16 | 88342639 | ZNF469 | c | g | -0.156 | 0.026 | 3.8E-09 | -- | 0  |
| rs9938961   | 16 | 88343597 | ZNF469 | a | g | -0.158 | 0.029 | 4.2E-08 | -- | 0  |
| rs149540885 | 18 | 52877255 | TCF4   | t | c | 0.441  | 0.080 | 3.3E-08 | ++ | 63 |
| rs11659764  | 18 | 53335512 | TCF4   | a | t | -0.320 | 0.054 | 3.9E-09 | -- | 0  |
| rs784256    | 18 | 53398626 | TCF4   | a | g | 0.178  | 0.032 | 3.5E-08 | ++ | 0  |
| rs148766287 | 21 | 47404422 | COL6A1 | c | g | 0.705  | 0.109 | 8.7E-11 | ++ | 0  |
| rs142493024 | 21 | 47413793 | COL6A1 | a | g | -0.719 | 0.108 | 2.9E-11 | -- | 0  |
| rs182804464 | 21 | 47420667 | COL6A1 | c | g | 0.731  | 0.107 | 1.0E-11 | ++ | 0  |

**eTable 5.** Corneal Tissue Specific Expression Profiles

Publicly available corneal RNA-seq data were analysed to determine the expression profile of selected genes from 2 distinct data sets. Data were retrieved from three human adult and two human fetal corneal endothelial samples (Chen et al., 2013) and from four distinct human limbal compartments; the basal limbal crypts (BLCs), the superficial limbal crypts (SLCs), the paracentral/central corneal epithelium (CE), and the adjacent limbal stroma (LS) (Bath et al., 2013). Data are presented as TPM (transcripts per million).

|                 | Expression (TPM)    |        |        |         |        |                     |       |        |      |
|-----------------|---------------------|--------|--------|---------|--------|---------------------|-------|--------|------|
|                 | Corneal Endothelium |        |        |         |        | Limbal Compartments |       |        |      |
|                 | Adult               |        |        | Fetal   |        | BLCs                | CE    | LS     | SLCs |
| Gene            | 1                   | 2      | 3      | 1       | 2      |                     |       |        |      |
| <i>ANAPC1</i>   | 11.12               | 7.43   | 12.27  | 14.54   | 10.46  | 11.08               | 10.34 | 3.85   | 8.92 |
| <i>ADAMTS8</i>  | 0.06                | 0.00   | 0.06   | 3.56    | 3.69   | 0.06                | 0.02  | 0.24   | 0.00 |
| <i>ADAMTS17</i> | 1.43                | 1.95   | 0.73   | 4.45    | 2.37   | 1.57                | 0.85  | 0.43   | 0.77 |
| <i>ABCA6</i>    | 13.55               | 8.75   | 3.17   | 2.00    | 0.68   | 4.64                | 4.88  | 119.41 | 2.64 |
| <i>COL6A1</i>   | 124.18              | 113.61 | 113.23 | 1041.27 | 957.61 | 2.78                | 1.31  | 62.82  | 1.49 |

## eReferences.

1. Riboli E, Kaaks R. The EPIC Project: rationale and study design. European Prospective Investigation into Cancer and Nutrition. *Int J Epidemiol*. 1997;26 Suppl 1(1):S6-14.
2. Hayat SA, Luben R, Keevil VL, et al. Cohort Profile: A prospective cohort study of objective physical and cognitive capability and visual health in an ageing population of men and women in Norfolk (EPIC-Norfolk 3). *Int J Epidemiol*. June 2013.
3. Khawaja AP, Chan MPY, Hayat S, et al. The EPIC-Norfolk Eye Study: rationale, methods and a cross-sectional analysis of visual impairment in a population-based cohort. *BMJ Open*. 2013;3(3):1-10.
4. Carbonaro F, Hysi PG, Fahy SJ, Nag A, Hammond CJ. Optic disc planimetry, corneal hysteresis, central corneal thickness, and intraocular pressure as risk factors for glaucoma. *Am J Ophthalmol*. 2014;157(2):441-446.
5. Auton A, Abecasis GR, Altshuler DM, et al. A global reference for human genetic variation. *Nature*. 2015;526(7571):68-74.
6. Howie BN, Donnelly P, Marchini J. A flexible and accurate genotype imputation method for the next generation of genome-wide association studies. *PLoS Genet*. 2009;5(6).
7. UK10K Consortium, Walter K, Min JL, et al. The UK10K project identifies rare variants in health and disease. *Nature*. 2015;526(7571):82-90.
8. Long T, Hicks M, Yu H-C, et al. Whole-genome sequencing identifies common-to-rare variants associated with human blood metabolites. *Nat Genet*. 2017;49(4):568-578.
9. Chen Y, Huang K, Nakatsu MN, Xue Z, Deng SX, Fan G. Identification of novel molecular markers through transcriptomic analysis in human fetal and adult corneal endothelial cells. *Hum Mol Genet*. 2013;22(7):1271-9.
10. Bath C, Muttuvelu D, Emmersen J, Vorum H, Hjortdal J, Zachar V. Transcriptional dissection of human limbal niche compartments by massive parallel sequencing. *PLoS One*. 2013;8(5):e64244.
11. Langmead B, Trapnell C, Pop M, Salzberg SL. Ultrafast and memory-efficient alignment of short DNA sequences to the human genome. *Genome Biol*. 2009;10(3):R25.
12. Liao Y, Smyth GK, Shi W. featureCounts: an efficient general purpose program for assigning

sequence reads to genomic features. *Bioinformatics*. 2014;30(7):923-930.

13. Wagner GP, Kin K, Lynch VJ. Measurement of mRNA abundance using RNA-seq data: RPKM measure is inconsistent among samples. *Theory Biosci*. 2012;131(4):281-285.
